# Supplementary material for: Mast Cell-Derived SAMD14 Is a Novel Regulator of the Human Prostate Tumor Microenvironment
Source: Cancers (Basel). 2021 Mar 11;13(6):1237. doi: 10.3390/cancers13061237 (PMC7999778; doi:10.3390/cancers13061237)
Supplement: Supplementary file 1 [file cancers-13-01237-s001.zip › Cancers_1133487_Supplementary tables.xlsx]

## Sheet: Table S1
Table S1: Clinical features and follow-up of patient radical prostatectomy tissue for the discovery and validation cohort.
		Discovery Cohort	Validation Cohort - qPCR	Validation Cohort - IHC
	Gleason Grade Group (GG)	GG2/GG3	GG2/GG3	GG2/GG3
	Patients, No	5	4	3
	Patient ID	P178; P179; P185; P187; P192	P333; P359, P371; P388	P349; P354; P390
	Age, median (range)	66.9 (60.5 – 73.6)	73 (67 - 74)	65 (64 - 85)
	Clinical features, median (range)
	PSA ng/mL	5.8 (4.8 – 8.3)	4.85 (3.26 - 16.6)	6.4 (5.8 - 7)
	Tumour volume	5.9 (2.7 – 23.6)	5.25 (2.3 - 10)	7.2 ( 2.0 - 10.6)
	Clinical features, no. (%)
	Pathologic T stage 2	2	2	0
	Pathologic T stage 3	3	2	3
	Positive margins	3	0	1
	Extra-prostatic extension	3	2	3
	Seminal vesicle invasion	0	1	1
	Lymph node metastases at diagnosis	0	0	0

## Sheet: Table S2
Table S2: Mast cell percentage and viable cell numbers isolated from primary human prostate tumor and non-tumor tissue for the discovery cohort.
Patient	Experimental Design	Tissue region	Grade group	Percentage of mast cells present in total viable cells population	Number of viable mast cells
P178	Discovery Cohort	Non-Tumour	GG2	0.0227	3140
		Tumour		0.0205	6000
P179		Non-Tumour	GG3	0.0321	3000
		Tumour		0.0228	4200
P185		Non-Tumour	GG2	0.121	41700
		Tumour		0.0648	7500
P187		Non-Tumour	GG2	0.0062	2300
		Tumour		0.0441	12000
P189		Non-Tumour	GG2	0.0186	6300
		Tumour		0.0055	774

## Sheet: Table S3
	Table S3: Gene set enrichment analysis results with hallmark gene sets on primary mast cells RNAseq dataset. Whole genes ordered by z-score from the meta-analysis were used as ranked gene for analysis. Enriched biological pathways in MC-T relative to MC-NT; Normalized enrichment score (NES).
	NAME	SIZE	ES	NES	NOM p-val	FDR q-val	FWER p-val	RANK AT MAX	LEADING EDGE
	HALLMARK_ANDROGEN_RESPONSE	97	0.4784	1.94401	0	0.00649832	0.003	2423	tags=33%, list=17%, signal=40%
	HALLMARK_NOTCH_SIGNALING	31	0.592123	1.91501	0.00282486	0.00428041	0.004	1005	tags=32%, list=7%, signal=35%
	HALLMARK_EPITHELIAL_MESENCHYMAL_TRANSITION	170	0.423873	1.91424	0	0.00285361	0.004	2567	tags=34%, list=18%, signal=41%
	HALLMARK_REACTIVE_OXYGEN_SPECIES_PATHWAY	45	0.467201	1.67602	0.00540541	0.0142603	0.024	2922	tags=29%, list=21%, signal=36%
	HALLMARK_COAGULATION	101	0.376934	1.58283	0	0.0271068	0.058	1176	tags=20%, list=8%, signal=21%
	HALLMARK_ESTROGEN_RESPONSE_EARLY	184	0.339764	1.53267	0	0.0358841	0.09	2009	tags=26%, list=14%, signal=29%
	HALLMARK_ESTROGEN_RESPONSE_LATE	182	0.322923	1.45535	0.00393701	0.059198	0.162	3442	tags=36%, list=25%, signal=47%
	HALLMARK_MYOGENESIS	160	0.328388	1.45006	0	0.0552826	0.172	2025	tags=26%, list=14%, signal=30%
	HALLMARK_HYPOXIA	179	0.306029	1.37066	0.00884956	0.0991733	0.312	2434	tags=24%, list=17%, signal=29%
	HALLMARK_COMPLEMENT	167	0.293725	1.31108	0.0212014	0.147462	0.473	2707	tags=28%, list=19%, signal=34%
	HALLMARK_APICAL_JUNCTION	166	0.288074	1.30558	0.0124481	0.14057	0.484	3097	tags=31%, list=22%, signal=39%
	HALLMARK_KRAS_SIGNALING_UP	162	0.290694	1.30122	0.0223048	0.133884	0.498	1601	tags=20%, list=11%, signal=23%
	HALLMARK_PROTEIN_SECRETION	93	0.300052	1.22556	0.103976	0.239965	0.744	1870	tags=18%, list=13%, signal=21%
	HALLMARK_UV_RESPONSE_DN	129	0.283514	1.22086	0.0909091	0.231813	0.758	2415	tags=27%, list=17%, signal=32%
	HALLMARK_GLYCOLYSIS	177	0.255264	1.1463	0.153846	0.381214	0.912	2985	tags=27%, list=21%, signal=33%
	HALLMARK_ANGIOGENESIS	28	0.349583	1.12673	0.277078	0.408296	0.933	1675	tags=25%, list=12%, signal=28%
	HALLMARK_XENOBIOTIC_METABOLISM	153	0.246075	1.10171	0.173913	0.461478	0.958	3766	tags=36%, list=27%, signal=49%
	HALLMARK_PEROXISOME	93	0.266791	1.09911	0.275316	0.444058	0.958	1742	tags=16%, list=12%, signal=18%
	HALLMARK_P53_PATHWAY	186	0.238912	1.09045	0.217213	0.44324	0.963	2000	tags=18%, list=14%, signal=21%
	HALLMARK_IL2_STAT5_SIGNALING	180	0.236971	1.08275	0.209205	0.441468	0.97	1819	tags=16%, list=13%, signal=18%
	HALLMARK_CHOLESTEROL_HOMEOSTASIS	67	0.267123	1.05341	0.343284	0.509149	0.987	2064	tags=18%, list=15%, signal=21%
	HALLMARK_INFLAMMATORY_RESPONSE	169	0.232993	1.05272	0.281385	0.488188	0.987	2834	tags=27%, list=20%, signal=33%
	HALLMARK_BILE_ACID_METABOLISM	87	0.257193	1.0499	0.33758	0.474572	0.989	2637	tags=26%, list=19%, signal=32%
	HALLMARK_APOPTOSIS	153	0.233291	1.02665	0.403587	0.526967	0.996	2567	tags=22%, list=18%, signal=26%
	HALLMARK_UV_RESPONSE_UP	143	0.227373	0.999244	0.482143	0.600945	0.999	4327	tags=38%, list=31%, signal=54%
	HALLMARK_KRAS_SIGNALING_DN	110	0.237601	0.987188	0.479592	0.619028	1	1773	tags=23%, list=13%, signal=26%
	HALLMARK_TGF_BETA_SIGNALING	51	0.265928	0.979564	0.488166	0.618271	1	3277	tags=29%, list=23%, signal=38%
	HALLMARK_UNFOLDED_PROTEIN_RESPONSE	107	0.229967	0.967443	0.534296	0.638311	1	3755	tags=28%, list=27%, signal=38%
	HALLMARK_APICAL_SURFACE	37	0.270027	0.923023	0.6	0.755794	1	3128	tags=30%, list=22%, signal=38%
	HALLMARK_TNFA_SIGNALING_VIA_NFKB	195	0.193632	0.888766	0.857778	0.826391	1	3869	tags=30%, list=28%, signal=41%
	HALLMARK_ADIPOGENESIS	180	0.186101	0.82766	0.95	0.930758	1	3039	tags=22%, list=22%, signal=28%
	HALLMARK_MTORC1_SIGNALING	193	0.17736	0.818344	0.952	0.91471	1	1757	tags=12%, list=13%, signal=13%
	HALLMARK_MYC_TARGETS_V2	57	0.180192	0.6696	0.984985	0.988178	1	2360	tags=14%, list=17%, signal=17%

## Sheet: Table S4
Table S4: Differentially expressed genes in MC-T dataset compared to MC-NT dataset (FDR < 0.1 and FC > 2).
Gene Symbol	Regulation of MC-T vs MC-NT	Log2 Fold- change	p value	FDR
NTN5	Down	-8.66114	1.07e-06	0.001
C19orf84	Down	-8.41217	1.46e-06	0.001199
ALG1	Down	-8.1847	3.58e-05	0.021774
PEX3	Down	-7.59972	6.46e-05	0.031134
FANCC	Down	-7.45452	6.18e-05	0.03085
LCAT	Down	-7.42636	0.000105	0.045812
SDHAF4	Down	-7.42185	0.000103	0.045812
SAMD14	Down	-7.20415	0.000136	0.053126
LRRK1	Down	-7.14138	0.000128	0.052846
SNAI3	Down	-7.12366	0.000291	0.096943
DRAM2	Down	-6.84807	1.58e-05	0.011084
ACRBP	Down	-6.82926	0.000282	0.096059
MTA3	Down	-6.28966	0.000114	0.048419
ARG2	Up	7.79361	4.05e-06	0.003147
SLC66A1	Up	6.91594	0.000138	0.053126
ANGPTL4	Up	3.9345	1.78e-05	0.011828
KLK2	Up	3.06169	1.02e-07	0.000102
AKAP12	Up	3.00703	4.73e-05	0.027547
KLK3	Up	3.00064	6.01e-27	2.8e-23
CEBPD	Up	2.89563	2.13e-16	5.97e-13
MGST1	Up	2.49063	1.23e-09	1.32e-06
ID3	Up	2.3842	8.28e-05	0.038602
EFNA1	Up	2.3356	5.98e-06	0.004405
MSMB	Up	2.23082	1.9e-19	6.65e-16
CRYAB	Up	1.97504	1.32e-06	0.001151
SOD2	Up	1.77833	1.94e-14	3.08e-11
AZGP1	Up	1.7056	1.87e-05	0.011906
FXYD3	Up	1.63679	0.00022	0.078893
ANXA2	Up	1.54483	5.37e-05	0.029672
NUPR1	Up	1.52594	6.07e-05	0.03085
MT1X	Up	1.42684	5.52e-05	0.029672
MT2A	Up	1.37597	1.12e-15	2.24e-12
TSC22D1	Up	1.33529	0.000181	0.066765
SAT1	Up	1.11996	5.83e-16	1.36e-12
TIMP1	Up	1.06117	3.41e-14	4.78e-11

## Sheet: Table S5
Table S5: Total secreted proteins identified from HMC-1 and HMC-1-SAMD14+ conditioned media.
Gene Name	Protein IDs	SAMD14_vs_C_log2 fold change	SAMD14_vs_C_p.val	SAMD14_vs_C_p.adj	significant	SAMD14_vs_C_significant	imputed	num_NAs	Protein.names
CD44	P16070	4.3	4.09e-06	0.00156	TRUE	TRUE	TRUE	3	CD44 antigen
SNRNP40	Q96DI7	-2.83	4.19e-06	0.00156	TRUE	TRUE	TRUE	3	U5 small nuclear ribonucleoprotein 40 kDa protein
APLP2	Q06481	4.69	5.38e-06	0.00156	TRUE	TRUE	TRUE	3	Amyloid-like protein 2
HLA-A	P30459	-2.84	1e-05	0.0016	TRUE	TRUE	TRUE	3	HLA class I histocompatibility antigen, A-74 alpha chain;HLA class I histocompatibility antigen, A-32 alpha chain;HLA class I histocompatibility antigen, A-36 alpha chain;HLA class I histocompatibility antigen, A-1 alpha chain;HLA class I histocompatibility antigen, A-11 alpha chain;HLA class I histocompatibility antigen, A-3 alpha chain
LASP1	Q14847	-3.45	1.05e-05	0.0016	TRUE	TRUE	TRUE	3	LIM and SH3 domain protein 1
NOLC1	Q14978	3.75	1.11e-05	0.0016	TRUE	TRUE	TRUE	3	Nucleolar and coiled-body phosphoprotein 1
TMA7	Q9Y2S6	4.25	1.36e-05	0.00168	TRUE	TRUE	TRUE	3	Translation machinery-associated protein 7
VGF	O15240	-3.32	1.99e-05	0.00211	TRUE	TRUE	TRUE	3	Neurosecretory protein VGF;Neuroendocrine regulatory peptide-1;Neuroendocrine regulatory peptide-2;Antimicrobial peptide VGF[554-577]
EEF1D	P29692	-4.07	2.27e-05	0.00211	TRUE	TRUE	TRUE	3	Elongation factor 1-delta
CHD4	Q14839	-2.37	2.43e-05	0.00211	TRUE	TRUE	TRUE	3	Chromodomain-helicase-DNA-binding protein 4
MAGEA4	P43358	2.57	3.08e-05	0.0023	TRUE	TRUE	TRUE	3	Melanoma-associated antigen 4
HCFC1	P51610	-2.54	3.33e-05	0.0023	TRUE	TRUE	TRUE	3	Host cell factor 1;HCF N-terminal chain 1;HCF N-terminal chain 2;HCF N-terminal chain 3;HCF N-terminal chain 4;HCF N-terminal chain 5;HCF N-terminal chain 6;HCF C-terminal chain 1;HCF C-terminal chain 2;HCF C-terminal chain 3;HCF C-terminal chain 4;HCF C-terminal chain 5;HCF C-terminal chain 6
C1orf123	Q9NWV4	-3.44	3.48e-05	0.0023	TRUE	TRUE	TRUE	3	UPF0587 protein C1orf123
RPL26L1	Q9UNX3	-5.92	3.71e-05	0.0023	TRUE	TRUE	TRUE	3	60S ribosomal protein L26-like 1;60S ribosomal protein L26
PUF60	Q9UHX1	-2.38	4.27e-05	0.00239	TRUE	TRUE	TRUE	3	Poly(U)-binding-splicing factor PUF60
ITM2B	Q9Y287	-2.61	4.67e-05	0.00239	TRUE	TRUE	TRUE	3	Integral membrane protein 2B;BRI2, membrane form;BRI2 intracellular domain;BRI2C, soluble form;Bri23 peptide
SAMD14	Q8IZD0	3.72	4.68e-05	0.00239	TRUE	TRUE	TRUE	3	Sterile alpha motif domain-containing protein 14
PPP5C	P53041	-2.02	4.98e-05	0.0024	TRUE	TRUE	TRUE	3	Serine/threonine-protein phosphatase 5
CNPY3	Q9BT09	2.63	5.67e-05	0.00259	TRUE	TRUE	TRUE	3	Protein canopy homolog 3
TCEB2	Q15370	-1.97	6.24e-05	0.0027	TRUE	TRUE	TRUE	3	Transcription elongation factor B polypeptide 2
C7orf50	Q9BRJ6	-2.88	8.2e-05	0.00332	TRUE	TRUE	TRUE	3	Uncharacterized protein C7orf50
TOP2B	Q02880	-2.6	8.43e-05	0.00332	TRUE	TRUE	TRUE	3	DNA topoisomerase 2-beta
SRRT	Q9BXP5	-2.36	0.000105	0.00393	TRUE	TRUE	TRUE	3	Serrate RNA effector molecule homolog
ADRM1	Q16186	2.21	0.000114	0.00393	TRUE	TRUE	TRUE	3	Proteasomal ubiquitin receptor ADRM1
CPSF6	Q16630	-2.49	0.000118	0.00393	TRUE	TRUE	TRUE	3	Cleavage and polyadenylation specificity factor subunit 6
PCMT1	P22061	-3.26	0.000119	0.00393	TRUE	TRUE	TRUE	3	Protein-L-isoaspartate(D-aspartate) O-methyltransferase
SF3B3	Q15393	2.18	0.000122	0.00393	TRUE	TRUE	TRUE	3	Splicing factor 3B subunit 3
ARPC1B	O15143	2.74	0.000131	0.00405	TRUE	TRUE	TRUE	3	Actin-related protein 2/3 complex subunit 1B
SF1	Q15637	-2.46	0.000181	0.00525	TRUE	TRUE	TRUE	3	Splicing factor 1
PDCD5	O14737	-4.7	0.000182	0.00525	TRUE	TRUE	TRUE	3	Programmed cell death protein 5
HIRIP3	Q9BW71	-3.47	0.000215	0.00602	TRUE	TRUE	TRUE	3	HIRA-interacting protein 3
AIMP1	Q12904	-3.52	0.000223	0.00605	TRUE	TRUE	TRUE	3	Aminoacyl tRNA synthase complex-interacting multifunctional protein 1;Endothelial monocyte-activating polypeptide 2
NAGK	Q9UJ70	3.02	0.000232	0.00606	TRUE	TRUE	TRUE	3	N-acetyl-D-glucosamine kinase
SF3A3	Q12874	1.79	0.000238	0.00606	TRUE	TRUE	TRUE	4	Splicing factor 3A subunit 3
PSMB9	P28065	2.28	0.000261	0.00647	TRUE	TRUE	TRUE	3	Proteasome subunit beta type-9
MAP1A	P78559	-1.59	0.000284	0.00671	TRUE	TRUE	TRUE	3	Microtubule-associated protein 1A;MAP1A heavy chain;MAP1 light chain LC2
ZPR1	O75312	1.99	0.000288	0.00671	TRUE	TRUE	TRUE	4	Zinc finger protein ZPR1
RRP1B	Q14684	1.93	0.000294	0.00671	TRUE	TRUE	TRUE	3	Ribosomal RNA processing protein 1 homolog B
PRDX5	P30044	-3.31	0.000329	0.0073	TRUE	TRUE	TRUE	3	Peroxiredoxin-5, mitochondrial
CAND1	Q86VP6	1.64	0.000368	0.00797	TRUE	TRUE	TRUE	4	Cullin-associated NEDD8-dissociated protein 1
GMFG	O60234	3.24	0.000392	0.00828	TRUE	TRUE	TRUE	3	Glia maturation factor gamma
HMGCS1	Q01581	-2.34	0.000432	0.00892	TRUE	TRUE	TRUE	3	Hydroxymethylglutaryl-CoA synthase, cytoplasmic
EIF1AX	P47813	-2.15	0.000457	0.00922	TRUE	TRUE	TRUE	3	Eukaryotic translation initiation factor 1A, X-chromosomal;Eukaryotic translation initiation factor 1A, Y-chromosomal
C14orf142	Q9BXV9	-2.07	0.000551	0.0108	TRUE	TRUE	TRUE	3	Uncharacterized protein C14orf142
PDCD4	Q53EL6	3.28	0.000576	0.0111	TRUE	TRUE	TRUE	3	Programmed cell death protein 4
UBAP2L	Q14157	-2.86	0.000587	0.0111	TRUE	TRUE	TRUE	3	Ubiquitin-associated protein 2-like
PRG2	P13727	1.38	0.000657	0.0121	TRUE	TRUE	FALSE	0	Bone marrow proteoglycan;Eosinophil granule major basic protein
EIF4G1	Q04637	3.17	0.000671	0.0121	TRUE	TRUE	TRUE	3	Eukaryotic translation initiation factor 4 gamma 1
PRDX4	Q13162	-2.16	0.000752	0.0131	TRUE	TRUE	TRUE	3	Peroxiredoxin-4
LGALS3BP	Q08380	-1.16	0.000754	0.0131	TRUE	TRUE	FALSE	0	Galectin-3-binding protein
NAPRT	Q6XQN6	-1.95	0.000797	0.0134	TRUE	TRUE	TRUE	3	Nicotinate phosphoribosyltransferase
SMARCA5	O60264	-2.13	0.000818	0.0134	TRUE	TRUE	TRUE	3	SWI/SNF-related matrix-associated actin-dependent regulator of chromatin subfamily A member 5
CCDC86	Q9H6F5	-2.58	0.000821	0.0134	TRUE	TRUE	TRUE	3	Coiled-coil domain-containing protein 86
CD55	P08174	2.08	0.000888	0.0143	TRUE	TRUE	TRUE	3	Complement decay-accelerating factor
ATP6AP1	Q15904	2.37	0.000921	0.0143	TRUE	TRUE	TRUE	3	V-type proton ATPase subunit S1
GLUD2	P49448	-2.01	0.000922	0.0143	TRUE	TRUE	TRUE	3	Glutamate dehydrogenase 2, mitochondrial
PLRG1	O43660	-2.67	0.00102	0.0155	TRUE	TRUE	TRUE	3	Pleiotropic regulator 1
UGP2	Q16851	2.03	0.00114	0.0171	TRUE	TRUE	TRUE	3	UTP--glucose-1-phosphate uridylyltransferase
FUCA1	P04066	1.42	0.00119	0.0174	TRUE	TRUE	FALSE	0	Tissue alpha-L-fucosidase
TXLNA	P40222	1.63	0.00123	0.0178	TRUE	TRUE	TRUE	3	Alpha-taxilin
FAM120A	Q9NZB2	-1.91	0.00127	0.018	TRUE	TRUE	TRUE	3	Constitutive coactivator of PPAR-gamma-like protein 1
XYLT1	Q86Y38	-2.74	0.0013	0.0182	TRUE	TRUE	TRUE	3	Xylosyltransferase 1
CSNK2A1	P68400	2.03	0.00148	0.0202	TRUE	TRUE	TRUE	3	Casein kinase II subunit alpha;Casein kinase II subunit alpha 3
ACAT1	P24752	1.99	0.00149	0.0202	TRUE	TRUE	TRUE	4	Acetyl-CoA acetyltransferase, mitochondrial
BUB3	O43684	2.92	0.00161	0.0215	TRUE	TRUE	TRUE	3	Mitotic checkpoint protein BUB3
CHORDC1	Q9UHD1	-2.08	0.00172	0.0225	TRUE	TRUE	TRUE	3	Cysteine and histidine-rich domain-containing protein 1
ANP32B	Q92688	1.68	0.00187	0.0241	TRUE	TRUE	FALSE	0	Acidic leucine-rich nuclear phosphoprotein 32 family member B
HTATSF1	O43719	2.06	0.00189	0.0241	TRUE	TRUE	TRUE	3	HIV Tat-specific factor 1
CPOX	P36551	-2.28	0.00195	0.0244	TRUE	TRUE	TRUE	3	Oxygen-dependent coproporphyrinogen-III oxidase, mitochondrial
ALDH4A1	P30038	-1.88	0.00197	0.0244	TRUE	TRUE	TRUE	3	Delta-1-pyrroline-5-carboxylate dehydrogenase, mitochondrial
SLK	Q9H2G2	-2.66	0.002	0.0244	TRUE	TRUE	TRUE	3	STE20-like serine/threonine-protein kinase
TPSAB1	Q15661	1.38	0.00212	0.0255	TRUE	TRUE	FALSE	0	Tryptase alpha/beta-1;Tryptase beta-2
PRRC2A	P48634	-1.57	0.00224	0.0266	TRUE	TRUE	TRUE	3	Protein PRRC2A
AIFM1	O95831	-2.2	0.00243	0.0285	TRUE	TRUE	TRUE	3	Apoptosis-inducing factor 1, mitochondrial
FBP1	P09467	-1.75	0.00261	0.0302	TRUE	TRUE	FALSE	0	Fructose-1,6-bisphosphatase 1
C2orf49	Q9BVC5	-1.74	0.00275	0.0314	TRUE	TRUE	TRUE	3	Ashwin
RNASET2	O00584	1.07	0.00282	0.0318	TRUE	TRUE	FALSE	0	Ribonuclease T2
HYOU1	Q9Y4L1	-1.59	0.00303	0.0336	TRUE	TRUE	TRUE	3	Hypoxia up-regulated protein 1
MAX	P61244	1.97	0.00314	0.0345	TRUE	TRUE	TRUE	3	Protein max
ZRANB2	O95218	2.02	0.0033	0.0358	TRUE	TRUE	TRUE	3	Zinc finger Ran-binding domain-containing protein 2
EIF3J	O75822	-0.925	0.00414	0.0443	FALSE	FALSE	FALSE	0	Eukaryotic translation initiation factor 3 subunit J
RPL28	P46779	2.74	0.00436	0.0451	TRUE	TRUE	TRUE	3	60S ribosomal protein L28
NRCAM	Q92823	1.11	0.00439	0.0451	TRUE	TRUE	FALSE	0	Neuronal cell adhesion molecule
ANP32E	Q9BTT0	0.91	0.00439	0.0451	FALSE	FALSE	FALSE	0	Acidic leucine-rich nuclear phosphoprotein 32 family member E
MCM3	P25205	1.56	0.00442	0.0451	TRUE	TRUE	TRUE	3	DNA replication licensing factor MCM3
CTSA	P10619	0.883	0.00461	0.0465	FALSE	FALSE	FALSE	0	Lysosomal protective protein;Lysosomal protective protein 32 kDa chain;Lysosomal protective protein 20 kDa chain
RPL27A	P46776	-2.38	0.00476	0.0474	TRUE	TRUE	TRUE	3	60S ribosomal protein L27a
HDLBP	Q00341	0.991	0.00483	0.0474	FALSE	FALSE	TRUE	4	Vigilin
GNS	P15586	0.858	0.00491	0.0474	FALSE	FALSE	FALSE	0	N-acetylglucosamine-6-sulfatase
HUWE1	Q7Z6Z7	2.05	0.00492	0.0474	TRUE	TRUE	TRUE	3	E3 ubiquitin-protein ligase HUWE1
HNRNPA1	P09651	0.803	0.00505	0.0481	FALSE	FALSE	FALSE	0	Heterogeneous nuclear ribonucleoprotein A1;Heterogeneous nuclear ribonucleoprotein A1, N-terminally processed;Heterogeneous nuclear ribonucleoprotein A1-like 2
ENO3	P13929	-1.06	0.00521	0.0491	TRUE	TRUE	FALSE	0	Beta-enolase
TCEAL4	Q96EI5	-1.55	0.00553	0.0516	FALSE	FALSE	TRUE	3	Transcription elongation factor A protein-like 4
MFGE8	Q08431	2.34	0.00595	0.0549	FALSE	FALSE	TRUE	3	Lactadherin;Lactadherin short form;Medin
SRSF2	Q01130	0.769	0.00609	0.0556	FALSE	FALSE	FALSE	0	Serine/arginine-rich splicing factor 2
GALNT2	Q10471	1.24	0.00684	0.0614	FALSE	FALSE	TRUE	3	Polypeptide N-acetylgalactosaminyltransferase 2;Polypeptide N-acetylgalactosaminyltransferase 2 soluble form
SCRN2	Q96FV2	-1.11	0.00686	0.0614	FALSE	FALSE	TRUE	3	Secernin-2
MAGOHB	Q96A72	-1.26	0.00712	0.063	FALSE	FALSE	TRUE	3	Protein mago nashi homolog 2;Protein mago nashi homolog
PRPF8	Q6P2Q9	1.55	0.0074	0.0648	FALSE	FALSE	TRUE	4	Pre-mRNA-processing-splicing factor 8
LNPEP	Q9UIQ6	-1.36	0.00766	0.0657	FALSE	FALSE	TRUE	2	Leucyl-cystinyl aminopeptidase;Leucyl-cystinyl aminopeptidase, pregnancy serum form
IMMT	Q16891	-2.37	0.00771	0.0657	FALSE	FALSE	TRUE	3	MICOS complex subunit MIC60
AKAP2	Q9Y2D5	1.6	0.00773	0.0657	FALSE	FALSE	TRUE	3	A-kinase anchor protein 2
DUT	P33316	-0.811	0.0086	0.0724	FALSE	FALSE	FALSE	0	Deoxyuridine 5-triphosphate nucleotidohydrolase, mitochondrial
SRSF1	Q07955	1.01	0.00875	0.073	FALSE	FALSE	FALSE	0	Serine/arginine-rich splicing factor 1
IARS2	Q9NSE4	-1.82	0.00886	0.0731	FALSE	FALSE	TRUE	3	Isoleucine--tRNA ligase, mitochondrial
RPL13	P26373	2.22	0.00903	0.0738	FALSE	FALSE	TRUE	4	60S ribosomal protein L13
CDCA3	Q99618	1.13	0.00926	0.075	FALSE	FALSE	TRUE	4	Cell division cycle-associated protein 3
LHPP	Q9H008	-2.02	0.00935	0.0751	FALSE	FALSE	TRUE	1	Phospholysine phosphohistidine inorganic pyrophosphate phosphatase
SLTM	Q9NWH9	-2.3	0.00944	0.0751	FALSE	FALSE	TRUE	4	SAFB-like transcription modulator
AMDHD2	Q9Y303	-1.42	0.01	0.0787	FALSE	FALSE	TRUE	3	Putative N-acetylglucosamine-6-phosphate deacetylase
ARPC2	O15144	1.15	0.0101	0.0787	FALSE	FALSE	FALSE	0	Actin-related protein 2/3 complex subunit 2
ADA	P00813	-0.73	0.0102	0.0787	FALSE	FALSE	FALSE	0	Adenosine deaminase
ZC3H18	Q86VM9	-1.35	0.0104	0.0795	FALSE	FALSE	TRUE	3	Zinc finger CCCH domain-containing protein 18
FARSA	Q9Y285	-1.46	0.0106	0.0805	FALSE	FALSE	TRUE	4	Phenylalanine--tRNA ligase alpha subunit
PPP1R14B	Q96C90	-1.8	0.0107	0.0805	FALSE	FALSE	TRUE	3	Protein phosphatase 1 regulatory subunit 14B
KHSRP	Q92945	-0.835	0.0109	0.081	FALSE	FALSE	FALSE	0	Far upstream element-binding protein 2
TMX3	Q96JJ7	-1.66	0.0109	0.081	FALSE	FALSE	TRUE	3	Protein disulfide-isomerase TMX3
CLSTN1	O94985	0.924	0.0113	0.0833	FALSE	FALSE	FALSE	0	Calsyntenin-1;Soluble Alc-alpha;CTF1-alpha
KIFC1	Q9BW19	1.26	0.0119	0.0859	FALSE	FALSE	TRUE	3	Kinesin-like protein KIFC1
ARSA	P15289	-0.965	0.012	0.0859	FALSE	FALSE	FALSE	0	Arylsulfatase A;Arylsulfatase A component B;Arylsulfatase A component C
HCLS1	P14317	-0.807	0.0121	0.0859	FALSE	FALSE	FALSE	0	Hematopoietic lineage cell-specific protein
TACC3	Q9Y6A5	-0.665	0.0121	0.0859	FALSE	FALSE	TRUE	3	Transforming acidic coiled-coil-containing protein 3
SRGN	P10124	0.79	0.0126	0.0885	FALSE	FALSE	FALSE	0	Serglycin
LTA4H	P09960	-0.699	0.0134	0.0932	FALSE	FALSE	FALSE	0	Leukotriene A-4 hydrolase
CTSB	P07858	0.701	0.0136	0.0932	FALSE	FALSE	FALSE	0	Cathepsin B;Cathepsin B light chain;Cathepsin B heavy chain
RPL9	P32969	-2.01	0.0137	0.0932	FALSE	FALSE	TRUE	2	60S ribosomal protein L9
SLC1A5	Q15758	-0.736	0.0137	0.0932	FALSE	FALSE	FALSE	0	Neutral amino acid transporter B(0)
GALC	P54803	-1.65	0.0138	0.0932	FALSE	FALSE	TRUE	4	Galactocerebrosidase
CLEC11A	Q9Y240	1.17	0.0139	0.0932	FALSE	FALSE	FALSE	0	C-type lectin domain family 11 member A
RRP9	O43818	-2.13	0.0141	0.0944	FALSE	FALSE	TRUE	2	U3 small nucleolar RNA-interacting protein 2
APRT	P07741	-1.93	0.0147	0.0975	FALSE	FALSE	TRUE	4	Adenine phosphoribosyltransferase
PSMC3	P17980	1.73	0.0161	0.106	FALSE	FALSE	TRUE	3	26S protease regulatory subunit 6A
APOBR	Q0VD83	-0.698	0.0164	0.107	FALSE	FALSE	FALSE	0	Apolipoprotein B receptor
ARSB	P15848	-1.39	0.0166	0.107	FALSE	FALSE	TRUE	3	Arylsulfatase B
AAMP	Q13685	-2.05	0.0169	0.108	FALSE	FALSE	TRUE	3	Angio-associated migratory cell protein
TUBA1A	Q71U36	1.33	0.017	0.108	FALSE	FALSE	FALSE	0	Tubulin alpha-1A chain;Tubulin alpha-1B chain;Tubulin alpha-3E chain
HSP90B1	P14625	1.09	0.0182	0.115	FALSE	FALSE	FALSE	0	Endoplasmin
LAMC1	P11047	1.39	0.0182	0.115	FALSE	FALSE	TRUE	3	Laminin subunit gamma-1
ICAM3	P32942	-1.59	0.019	0.118	FALSE	FALSE	TRUE	1	Intercellular adhesion molecule 3
ACIN1	Q9UKV3	-0.604	0.02	0.123	FALSE	FALSE	FALSE	0	Apoptotic chromatin condensation inducer in the nucleus
PAPOLA	P51003	-1.81	0.0203	0.123	FALSE	FALSE	TRUE	4	Poly(A) polymerase alpha
TCEA1	P23193	-0.953	0.0204	0.123	FALSE	FALSE	TRUE	3	Transcription elongation factor A protein 1
DNAJC8	O75937	-0.733	0.0205	0.123	FALSE	FALSE	FALSE	0	DnaJ homolog subfamily C member 8
RPS16	P62249	1.15	0.0206	0.123	FALSE	FALSE	FALSE	0	40S ribosomal protein S16
CCDC9	Q9Y3X0	1.24	0.0207	0.123	FALSE	FALSE	TRUE	3	Coiled-coil domain-containing protein 9
HNRNPUL1	Q9BUJ2	-3.25	0.021	0.125	FALSE	FALSE	TRUE	2	Heterogeneous nuclear ribonucleoprotein U-like protein 1
DDC	P20711	-0.993	0.0226	0.132	FALSE	FALSE	TRUE	3	Aromatic-L-amino-acid decarboxylase
DNASE2	O00115	-1.95	0.0226	0.132	FALSE	FALSE	TRUE	4	Deoxyribonuclease-2-alpha
IGFBP2	P18065	0.828	0.0229	0.132	FALSE	FALSE	FALSE	0	Insulin-like growth factor-binding protein 2
ALDOA	P04075	-0.644	0.0231	0.132	FALSE	FALSE	FALSE	0	Fructose-bisphosphate aldolase A
HMGB1	P09429	0.592	0.0231	0.132	FALSE	FALSE	FALSE	0	High mobility group protein B1
MRC2	Q9UBG0	-1.92	0.0232	0.132	FALSE	FALSE	TRUE	4	C-type mannose receptor 2
PSMB10	P40306	-0.811	0.0234	0.132	FALSE	FALSE	FALSE	0	Proteasome subunit beta type-10
CD3EAP	O15446	-0.702	0.0242	0.136	FALSE	FALSE	FALSE	0	DNA-directed RNA polymerase I subunit RPA34
ACP1	P24666	-1.3	0.0246	0.137	FALSE	FALSE	TRUE	3	Low molecular weight phosphotyrosine protein phosphatase
SF3B2	Q13435	-0.799	0.0247	0.137	FALSE	FALSE	FALSE	0	Splicing factor 3B subunit 2
PHPT1	Q9NRX4	-2.27	0.0248	0.137	FALSE	FALSE	FALSE	0	14 kDa phosphohistidine phosphatase
BAG3	O95817	-1.09	0.0261	0.143	FALSE	FALSE	TRUE	3	BAG family molecular chaperone regulator 3
CPPED1	Q9BRF8	-0.607	0.0269	0.146	FALSE	FALSE	FALSE	0	Serine/threonine-protein phosphatase CPPED1
HEXB	P07686	0.902	0.0272	0.147	FALSE	FALSE	FALSE	0	Beta-hexosaminidase subunit beta;Beta-hexosaminidase subunit beta chain B;Beta-hexosaminidase subunit beta chain A
MAP7D1	Q3KQU3	-0.842	0.0272	0.147	FALSE	FALSE	TRUE	3	MAP7 domain-containing protein 1
CS	O75390	2.77	0.0274	0.147	FALSE	FALSE	TRUE	2	Citrate synthase, mitochondrial
SHPK	Q9UHJ6	0.804	0.028	0.148	FALSE	FALSE	FALSE	0	Sedoheptulokinase
TBC1D10B	Q4KMP7	-1.7	0.028	0.148	FALSE	FALSE	TRUE	4	TBC1 domain family member 10B
HDGFRP2	Q7Z4V5	-0.609	0.0282	0.148	FALSE	FALSE	FALSE	0	Hepatoma-derived growth factor-related protein 2
GPI	P06744	-0.608	0.0287	0.149	FALSE	FALSE	FALSE	0	Glucose-6-phosphate isomerase
ITGB1	P05556	1.05	0.0288	0.149	FALSE	FALSE	FALSE	0	Integrin beta-1
MIF	P14174	-0.66	0.0289	0.149	FALSE	FALSE	FALSE	0	Macrophage migration inhibitory factor
CSRP1	P21291	-0.773	0.0293	0.15	FALSE	FALSE	FALSE	0	Cysteine and glycine-rich protein 1
DPP7	Q9UHL4	1.34	0.03	0.153	FALSE	FALSE	FALSE	0	Dipeptidyl peptidase 2
MYL12A	P19105	-1.62	0.0302	0.153	FALSE	FALSE	TRUE	3	Myosin regulatory light chain 12A;Myosin regulatory light chain 12B;Myosin regulatory light polypeptide 9
ZYX	Q15942	-0.557	0.0304	0.153	FALSE	FALSE	FALSE	0	Zyxin
WDR44	Q5JSH3	-1.16	0.0321	0.161	FALSE	FALSE	TRUE	4	WD repeat-containing protein 44
LARP1	Q6PKG0	-0.754	0.0327	0.163	FALSE	FALSE	FALSE	0	La-related protein 1
ABHD10	Q9NUJ1	1.49	0.0328	0.163	FALSE	FALSE	TRUE	3	Mycophenolic acid acyl-glucuronide esterase, mitochondrial
MTPN	P58546	-0.679	0.0342	0.168	FALSE	FALSE	FALSE	0	Myotrophin
CFL1	P23528	-0.591	0.0357	0.175	FALSE	FALSE	FALSE	0	Cofilin-1
PLAUR	Q03405	-1.06	0.0362	0.177	FALSE	FALSE	TRUE	3	Urokinase plasminogen activator surface receptor
RBM14	Q96PK6	1.25	0.0364	0.177	FALSE	FALSE	TRUE	4	RNA-binding protein 14
PSMB7	Q99436	0.576	0.0371	0.178	FALSE	FALSE	FALSE	0	Proteasome subunit beta type-7
GGH	Q92820	1.61	0.0372	0.178	FALSE	FALSE	TRUE	4	Gamma-glutamyl hydrolase
WDR12	Q9GZL7	-1.79	0.0374	0.178	FALSE	FALSE	TRUE	4	Ribosome biogenesis protein WDR12
TAF15	Q92804	1.42	0.0376	0.178	FALSE	FALSE	TRUE	3	TATA-binding protein-associated factor 2N
GAA	P10253	-1.1	0.0386	0.182	FALSE	FALSE	TRUE	3	Lysosomal alpha-glucosidase;76 kDa lysosomal alpha-glucosidase;70 kDa lysosomal alpha-glucosidase
MDH2	P40926	0.759	0.0389	0.182	FALSE	FALSE	FALSE	0	Malate dehydrogenase, mitochondrial
TNFRSF14	Q92956	1.72	0.0392	0.183	FALSE	FALSE	TRUE	3	Tumor necrosis factor receptor superfamily member 14
PREPL	Q4J6C6	-0.693	0.0394	0.183	FALSE	FALSE	FALSE	0	Prolyl endopeptidase-like
ALAD	P13716	-0.481	0.0406	0.187	FALSE	FALSE	FALSE	0	Delta-aminolevulinic acid dehydratase
HSP90AA1	P07900	1.11	0.0408	0.187	FALSE	FALSE	FALSE	0	Heat shock protein HSP 90-alpha
RPS10	P46783	0.972	0.041	0.187	FALSE	FALSE	FALSE	0	40S ribosomal protein S10;Putative 40S ribosomal protein S10-like
ERAP1	Q9NZ08	-0.716	0.0411	0.187	FALSE	FALSE	FALSE	0	Endoplasmic reticulum aminopeptidase 1
VPS26A	O75436	-2.66	0.0414	0.187	FALSE	FALSE	TRUE	4	Vacuolar protein sorting-associated protein 26A
TBCA	O75347	-0.741	0.0436	0.195	FALSE	FALSE	FALSE	0	Tubulin-specific chaperone A
EIF3C	Q99613	0.59	0.0437	0.195	FALSE	FALSE	FALSE	0	Eukaryotic translation initiation factor 3 subunit C;Eukaryotic translation initiation factor 3 subunit C-like protein
ABI1	Q8IZP0	-2.05	0.0443	0.196	FALSE	FALSE	TRUE	4	Abl interactor 1
RPL17	P18621	-0.66	0.0443	0.196	FALSE	FALSE	FALSE	0	60S ribosomal protein L17
EIF5A	P63241	-0.582	0.0447	0.197	FALSE	FALSE	FALSE	0	Eukaryotic translation initiation factor 5A-1;Eukaryotic translation initiation factor 5A-1-like
VIM	P08670	1.12	0.0456	0.2	FALSE	FALSE	FALSE	0	Vimentin
PTPN6	P29350	0.915	0.0462	0.201	FALSE	FALSE	FALSE	0	Tyrosine-protein phosphatase non-receptor type 6
COA4	Q9NYJ1	-0.536	0.0467	0.201	FALSE	FALSE	FALSE	0	Cytochrome c oxidase assembly factor 4 homolog, mitochondrial
PPT1	P50897	0.794	0.0467	0.201	FALSE	FALSE	FALSE	0	Palmitoyl-protein thioesterase 1
ARHGAP25	P42331	-1.14	0.0469	0.201	FALSE	FALSE	TRUE	1	Rho GTPase-activating protein 25
MT2A	P02795	-1.19	0.047	0.201	FALSE	FALSE	FALSE	0	Metallothionein-2
EEF2	P13639	0.993	0.0477	0.202	FALSE	FALSE	FALSE	0	Elongation factor 2
NQO2	P16083	-0.558	0.0479	0.202	FALSE	FALSE	FALSE	0	Ribosyldihydronicotinamide dehydrogenase [quinone]
HNRNPC	P07910	-0.479	0.048	0.202	FALSE	FALSE	FALSE	0	Heterogeneous nuclear ribonucleoproteins C1/C2
RCSD1	Q6JBY9	-0.689	0.0496	0.208	FALSE	FALSE	FALSE	0	CapZ-interacting protein
HDHD2	Q9H0R4	-0.955	0.0503	0.209	FALSE	FALSE	FALSE	0	Haloacid dehalogenase-like hydrolase domain-containing protein 2
HNRNPA2B1	P22626	0.558	0.0503	0.209	FALSE	FALSE	FALSE	0	Heterogeneous nuclear ribonucleoproteins A2/B1
SF3A1	Q15459	-0.542	0.0509	0.21	FALSE	FALSE	FALSE	0	Splicing factor 3A subunit 1
TP53BP1	Q12888	-0.817	0.0512	0.21	FALSE	FALSE	FALSE	0	Tumor suppressor p53-binding protein 1
SAFB	Q15424	-0.59	0.0548	0.224	FALSE	FALSE	FALSE	0	Scaffold attachment factor B1
PPM1G	O15355	0.625	0.056	0.228	FALSE	FALSE	FALSE	0	Protein phosphatase 1G
UROD	P06132	-2.2	0.0588	0.238	FALSE	FALSE	TRUE	4	Uroporphyrinogen decarboxylase
SCAF4	O95104	0.716	0.0591	0.238	FALSE	FALSE	TRUE	1	Splicing factor, arginine/serine-rich 15
RPS15	P62841	0.643	0.0594	0.239	FALSE	FALSE	FALSE	0	40S ribosomal protein S15
FAM129B	Q96TA1	1.76	0.06	0.24	FALSE	FALSE	TRUE	4	Niban-like protein 1
MT1X	P80297	-0.867	0.0602	0.24	FALSE	FALSE	FALSE	0	Metallothionein-1X
FUS	P35637	-0.434	0.0609	0.241	FALSE	FALSE	FALSE	0	RNA-binding protein FUS
TRIM28	Q13263	-0.536	0.0612	0.241	FALSE	FALSE	FALSE	0	Transcription intermediary factor 1-beta
MAP1B	P46821	-0.454	0.0631	0.246	FALSE	FALSE	FALSE	0	Microtubule-associated protein 1B;MAP1B heavy chain;MAP1 light chain LC1
PEPD	P12955	0.485	0.0633	0.246	FALSE	FALSE	FALSE	0	Xaa-Pro dipeptidase
HNRNPUL2	Q1KMD3	-0.463	0.0638	0.246	FALSE	FALSE	FALSE	0	Heterogeneous nuclear ribonucleoprotein U-like protein 2
OGFOD1	Q8N543	-1.69	0.064	0.246	FALSE	FALSE	TRUE	4	Prolyl 3-hydroxylase OGFOD1
ENO2	P09104	-0.524	0.0642	0.246	FALSE	FALSE	FALSE	0	Gamma-enolase
RCN3	Q96D15	0.639	0.0644	0.246	FALSE	FALSE	FALSE	0	Reticulocalbin-3
LAP3	P28838	0.632	0.0645	0.246	FALSE	FALSE	FALSE	0	Cytosol aminopeptidase
EIF6	P56537	-0.577	0.065	0.247	FALSE	FALSE	FALSE	0	Eukaryotic translation initiation factor 6
RBM39	Q14498	1.11	0.0654	0.248	FALSE	FALSE	TRUE	3	RNA-binding protein 39
CBX1	P83916	-0.676	0.0672	0.253	FALSE	FALSE	FALSE	0	Chromobox protein homolog 1
HEXIM1	O94992	-2.53	0.0694	0.258	FALSE	FALSE	TRUE	4	Protein HEXIM1
RPL35A	P18077	2.32	0.0694	0.258	FALSE	FALSE	FALSE	0	60S ribosomal protein L35a
MANBA	O00462	0.73	0.0695	0.258	FALSE	FALSE	TRUE	3	Beta-mannosidase
HNRNPM	P52272	-0.473	0.0699	0.258	FALSE	FALSE	FALSE	0	Heterogeneous nuclear ribonucleoprotein M
PEBP1	P30086	-0.488	0.07	0.258	FALSE	FALSE	FALSE	0	Phosphatidylethanolamine-binding protein 1;Hippocampal cholinergic neurostimulating peptide
GCLC	P48506	-0.404	0.0713	0.26	FALSE	FALSE	FALSE	0	Glutamate--cysteine ligase catalytic subunit
GOT2	P00505	0.737	0.0714	0.26	FALSE	FALSE	FALSE	0	Aspartate aminotransferase, mitochondrial
GNPDA1	P46926	-2.97	0.0715	0.26	FALSE	FALSE	TRUE	4	Glucosamine-6-phosphate isomerase 1
CTTN	Q14247	-1.29	0.0726	0.263	FALSE	FALSE	TRUE	4	Src substrate cortactin
LSM5	Q9Y4Y9	-0.875	0.0728	0.263	FALSE	FALSE	TRUE	1	U6 snRNA-associated Sm-like protein LSm5
VAT1	Q99536	1.11	0.0735	0.264	FALSE	FALSE	TRUE	1	Synaptic vesicle membrane protein VAT-1 homolog
NACA	E9PAV3	0.591	0.0738	0.264	FALSE	FALSE	FALSE	0	Nascent polypeptide-associated complex subunit alpha, muscle-specific form;Nascent polypeptide-associated complex subunit alpha
EEF1B2	P24534	-0.653	0.0739	0.264	FALSE	FALSE	FALSE	0	Elongation factor 1-beta
IDE	P14735	-0.437	0.0747	0.266	FALSE	FALSE	FALSE	0	Insulin-degrading enzyme
PNPO	Q9NVS9	-0.47	0.0752	0.266	FALSE	FALSE	FALSE	0	Pyridoxine-5-phosphate oxidase
RPL5	P46777	0.875	0.0756	0.267	FALSE	FALSE	FALSE	0	60S ribosomal protein L5
RPL3	P39023	-0.598	0.0762	0.268	FALSE	FALSE	FALSE	0	60S ribosomal protein L3
MEPCE	Q7L2J0	-1.44	0.0779	0.269	FALSE	FALSE	TRUE	4	7SK snRNA methylphosphate capping enzyme
S100A11	P31949	0.53	0.0779	0.269	FALSE	FALSE	FALSE	0	Protein S100-A11;Protein S100-A11, N-terminally processed
RPLP0	P05388	0.501	0.0785	0.269	FALSE	FALSE	FALSE	0	60S acidic ribosomal protein P0;60S acidic ribosomal protein P0-like
S100A4	P26447	-1.07	0.0785	0.269	FALSE	FALSE	FALSE	0	Protein S100-A4
GDI1	P31150	-0.433	0.0786	0.269	FALSE	FALSE	FALSE	0	Rab GDP dissociation inhibitor alpha
RPL11	P62913	0.834	0.0788	0.269	FALSE	FALSE	FALSE	0	60S ribosomal protein L11
APOA1BP	Q8NCW5	-0.471	0.0791	0.269	FALSE	FALSE	FALSE	0	NAD(P)H-hydrate epimerase
PPP1R18	Q6NYC8	-0.498	0.0793	0.269	FALSE	FALSE	FALSE	0	Phostensin
PCBD1	P61457	-2.86	0.0795	0.269	FALSE	FALSE	TRUE	4	Pterin-4-alpha-carbinolamine dehydratase
ANXA5	P08758	-0.495	0.0801	0.27	FALSE	FALSE	FALSE	0	Annexin A5
GBE1	Q04446	-0.514	0.0809	0.27	FALSE	FALSE	TRUE	4	1,4-alpha-glucan-branching enzyme
AARS	P49588	-0.963	0.081	0.27	FALSE	FALSE	FALSE	0	Alanine--tRNA ligase, cytoplasmic
RPL15	P61313	-0.593	0.081	0.27	FALSE	FALSE	FALSE	0	60S ribosomal protein L15
PRMT1	Q99873	-0.403	0.0818	0.271	FALSE	FALSE	FALSE	0	Protein arginine N-methyltransferase 1
ECM1	Q16610	0.572	0.082	0.271	FALSE	FALSE	FALSE	0	Extracellular matrix protein 1
CTSZ	Q9UBR2	0.445	0.0824	0.271	FALSE	FALSE	FALSE	0	Cathepsin Z
RPL23	P62829	0.616	0.0824	0.271	FALSE	FALSE	FALSE	0	60S ribosomal protein L23
RPS19	P39019	0.776	0.0828	0.271	FALSE	FALSE	FALSE	0	40S ribosomal protein S19
PPA1	Q15181	-0.509	0.0833	0.271	FALSE	FALSE	FALSE	0	Inorganic pyrophosphatase
EWSR1	Q01844	-0.533	0.0836	0.271	FALSE	FALSE	FALSE	0	RNA-binding protein EWS
IDH1	O75874	0.876	0.0839	0.271	FALSE	FALSE	FALSE	0	Isocitrate dehydrogenase [NADP] cytoplasmic
ME1	P48163	-1.22	0.0842	0.271	FALSE	FALSE	TRUE	3	NADP-dependent malic enzyme
HNRNPAB	Q99729	0.578	0.0859	0.275	FALSE	FALSE	FALSE	0	Heterogeneous nuclear ribonucleoprotein A/B
HDGF	P51858	-0.415	0.086	0.275	FALSE	FALSE	FALSE	0	Hepatoma-derived growth factor
SUMO1	P63165	-0.532	0.0869	0.277	FALSE	FALSE	FALSE	0	Small ubiquitin-related modifier 1
SQSTM1	Q13501	-1.53	0.0871	0.277	FALSE	FALSE	TRUE	4	Sequestosome-1
THUMPD1	Q9NXG2	0.779	0.0879	0.278	FALSE	FALSE	FALSE	0	THUMP domain-containing protein 1
CTSC	P53634	-0.399	0.0915	0.287	FALSE	FALSE	FALSE	0	Dipeptidyl peptidase 1;Dipeptidyl peptidase 1 exclusion domain chain;Dipeptidyl peptidase 1 heavy chain;Dipeptidyl peptidase 1 light chain
AHCY	P23526	-0.427	0.0917	0.287	FALSE	FALSE	FALSE	0	Adenosylhomocysteinase
C9orf64	Q5T6V5	0.757	0.0917	0.287	FALSE	FALSE	TRUE	1	UPF0553 protein C9orf64
PIR	O00625	-0.579	0.0928	0.288	FALSE	FALSE	FALSE	0	Pirin
NRD1	O43847	0.433	0.0931	0.288	FALSE	FALSE	FALSE	0	Nardilysin
UCHL3	P15374	-0.652	0.0933	0.288	FALSE	FALSE	FALSE	0	Ubiquitin carboxyl-terminal hydrolase isozyme L3
PSMD2	Q13200	-1.78	0.0941	0.288	FALSE	FALSE	TRUE	4	26S proteasome non-ATPase regulatory subunit 2
PDAP1	Q13442	-2.79	0.0943	0.288	FALSE	FALSE	TRUE	2	28 kDa heat- and acid-stable phosphoprotein
YWHAE	P62258	-0.401	0.0944	0.288	FALSE	FALSE	FALSE	0	14-3-3 protein epsilon
CLU	P10909	1.52	0.0945	0.288	FALSE	FALSE	TRUE	1	Clusterin;Clusterin beta chain;Clusterin alpha chain
TTC1	Q99614	-0.39	0.0945	0.288	FALSE	FALSE	FALSE	0	Tetratricopeptide repeat protein 1
PSMA4	P25789	-1.49	0.0955	0.289	FALSE	FALSE	FALSE	0	Proteasome subunit alpha type-4
SPN	P16150	-1.26	0.0955	0.289	FALSE	FALSE	TRUE	4	Leukosialin
ACAA2	P42765	0.526	0.0964	0.29	FALSE	FALSE	FALSE	0	3-ketoacyl-CoA thiolase, mitochondrial
SRRM2	Q9UQ35	-0.391	0.097	0.291	FALSE	FALSE	FALSE	0	Serine/arginine repetitive matrix protein 2
MAT2A	P31153	-0.636	0.098	0.293	FALSE	FALSE	FALSE	0	S-adenosylmethionine synthase isoform type-2
YWHAH	Q04917	-0.433	0.0984	0.293	FALSE	FALSE	FALSE	0	14-3-3 protein eta
HN1	Q9UK76	-0.562	0.0999	0.295	FALSE	FALSE	FALSE	0	Hematological and neurological expressed 1 protein;Hematological and neurological expressed 1 protein, N-terminally processed
YWHAQ	P27348	0.443	0.0999	0.295	FALSE	FALSE	FALSE	0	14-3-3 protein theta
PREP	P48147	-0.387	0.1	0.295	FALSE	FALSE	FALSE	0	Prolyl endopeptidase
FABP5	Q01469	-0.709	0.101	0.296	FALSE	FALSE	FALSE	0	Fatty acid-binding protein, epidermal
RBM8A	Q9Y5S9	-0.408	0.101	0.296	FALSE	FALSE	FALSE	0	RNA-binding protein 8A
FAM192A	Q9GZU8	-0.397	0.102	0.297	FALSE	FALSE	FALSE	0	Protein FAM192A
FKBP1A	P62942	-1.38	0.103	0.298	FALSE	FALSE	TRUE	1	Peptidyl-prolyl cis-trans isomerase FKBP1A
PGLS	O95336	-0.36	0.104	0.301	FALSE	FALSE	FALSE	0	6-phosphogluconolactonase
RPL10A	P62906	0.608	0.105	0.303	FALSE	FALSE	FALSE	0	60S ribosomal protein L10a
CD300A	Q9UGN4	1.65	0.106	0.303	FALSE	FALSE	TRUE	1	CMRF35-like molecule 8
IDS	P22304	0.458	0.106	0.303	FALSE	FALSE	FALSE	0	Iduronate 2-sulfatase;Iduronate 2-sulfatase 42 kDa chain;Iduronate 2-sulfatase 14 kDa chain
NUDT5	Q9UKK9	-0.371	0.106	0.303	FALSE	FALSE	FALSE	0	ADP-sugar pyrophosphatase
RANBP1	P43487	-0.486	0.106	0.303	FALSE	FALSE	FALSE	0	Ran-specific GTPase-activating protein
CRYZ	Q08257	0.493	0.107	0.304	FALSE	FALSE	FALSE	0	Quinone oxidoreductase
NPEPPS	P55786	0.472	0.108	0.305	FALSE	FALSE	FALSE	0	Puromycin-sensitive aminopeptidase
GMFB	P60983	-0.672	0.11	0.31	FALSE	FALSE	TRUE	4	Glia maturation factor beta
RPS24	P62847	1.49	0.11	0.31	FALSE	FALSE	TRUE	1	40S ribosomal protein S24
RPL7A	P62424	0.511	0.111	0.31	FALSE	FALSE	FALSE	0	60S ribosomal protein L7a
CST3	P01034	0.62	0.112	0.312	FALSE	FALSE	FALSE	0	Cystatin-C
SUPT16H	Q9Y5B9	0.456	0.112	0.312	FALSE	FALSE	FALSE	0	FACT complex subunit SPT16
ADSL	P30566	-0.929	0.114	0.316	FALSE	FALSE	TRUE	4	Adenylosuccinate lyase
PRDX6	P30041	-0.507	0.115	0.319	FALSE	FALSE	FALSE	0	Peroxiredoxin-6
AAMDC	Q9H7C9	-0.949	0.117	0.321	FALSE	FALSE	TRUE	1	Mth938 domain-containing protein
CPQ	Q9Y646	-0.359	0.117	0.321	FALSE	FALSE	FALSE	0	Carboxypeptidase Q
GSTP1	P09211	-0.429	0.117	0.321	FALSE	FALSE	FALSE	0	Glutathione S-transferase P
GOT1	P17174	-0.395	0.118	0.324	FALSE	FALSE	FALSE	0	Aspartate aminotransferase, cytoplasmic
PSMB6	P28072	0.608	0.12	0.328	FALSE	FALSE	FALSE	0	Proteasome subunit beta type-6
CBS	P0DN79	1.72	0.121	0.329	FALSE	FALSE	TRUE	4	Cystathionine beta-synthase
SHMT2	P34897	-1.41	0.122	0.331	FALSE	FALSE	FALSE	0	Serine hydroxymethyltransferase, mitochondrial
HIST1H1E	P10412	0.853	0.123	0.332	FALSE	FALSE	FALSE	0	Histone H1.4
MAN2B2	Q9Y2E5	0.583	0.123	0.332	FALSE	FALSE	FALSE	0	Epididymis-specific alpha-mannosidase
B2M	P61769	0.788	0.124	0.333	FALSE	FALSE	FALSE	0	Beta-2-microglobulin;Beta-2-microglobulin form pI 5.3
CCT8	P50990	1.06	0.124	0.333	FALSE	FALSE	TRUE	3	T-complex protein 1 subunit theta
RPL10	P27635	-1.49	0.125	0.333	FALSE	FALSE	TRUE	4	60S ribosomal protein L10
BCAT2	O15382	-1.34	0.126	0.334	FALSE	FALSE	TRUE	2	Branched-chain-amino-acid aminotransferase, mitochondrial
GMDS	O60547	0.492	0.126	0.334	FALSE	FALSE	FALSE	0	GDP-mannose 4,6 dehydratase
ATPIF1	Q9UII2	1.78	0.127	0.334	FALSE	FALSE	TRUE	1	ATPase inhibitor, mitochondrial
TPD52L2	O43399	-0.732	0.127	0.334	FALSE	FALSE	TRUE	3	Tumor protein D54
GLA	P06280	-0.657	0.128	0.336	FALSE	FALSE	TRUE	1	Alpha-galactosidase A
SLC3A2	P08195	0.447	0.128	0.336	FALSE	FALSE	FALSE	0	4F2 cell-surface antigen heavy chain
EIF1	P41567	-0.56	0.129	0.336	FALSE	FALSE	FALSE	0	Eukaryotic translation initiation factor 1
CALU	O43852	0.359	0.131	0.341	FALSE	FALSE	FALSE	0	Calumenin
IPO7	O95373	1.08	0.131	0.341	FALSE	FALSE	TRUE	2	Importin-7
HSP90AB1	P08238	0.732	0.132	0.341	FALSE	FALSE	FALSE	0	Heat shock protein HSP 90-beta
MAP4	P27816	-0.337	0.132	0.341	FALSE	FALSE	FALSE	0	Microtubule-associated protein 4
CDV3	Q9UKY7	-0.381	0.133	0.342	FALSE	FALSE	FALSE	0	Protein CDV3 homolog
SNRPB	P14678	-0.341	0.133	0.342	FALSE	FALSE	TRUE	4	Small nuclear ribonucleoprotein-associated proteins B and B;Small nuclear ribonucleoprotein-associated protein N
SLC9A3R1	O14745	-0.582	0.135	0.345	FALSE	FALSE	FALSE	0	Na(+)/H(+) exchange regulatory cofactor NHE-RF1
KARS	Q15046	0.452	0.136	0.347	FALSE	FALSE	FALSE	0	Lysine--tRNA ligase
RPS27L	Q71UM5	2.54	0.138	0.351	FALSE	FALSE	TRUE	1	40S ribosomal protein S27-like
MYH9	P35579	-0.387	0.143	0.362	FALSE	FALSE	FALSE	0	Myosin-9
TALDO1	P37837	0.891	0.143	0.363	FALSE	FALSE	FALSE	0	Transaldolase
HMGB2	P26583	0.558	0.145	0.363	FALSE	FALSE	FALSE	0	High mobility group protein B2
MEMO1	Q9Y316	-1.03	0.145	0.363	FALSE	FALSE	TRUE	4	Protein MEMO1
OLA1	Q9NTK5	-0.331	0.145	0.363	FALSE	FALSE	FALSE	0	Obg-like ATPase 1
SNW1	Q13573	-0.412	0.145	0.363	FALSE	FALSE	FALSE	0	SNW domain-containing protein 1
TMSB4X	P62328	0.581	0.147	0.366	FALSE	FALSE	FALSE	0	Thymosin beta-4;Hematopoietic system regulatory peptide
COTL1	Q14019	0.362	0.148	0.366	FALSE	FALSE	FALSE	0	Coactosin-like protein
FH	P07954	-0.45	0.149	0.366	FALSE	FALSE	FALSE	0	Fumarate hydratase, mitochondrial
GRHPR	Q9UBQ7	-0.369	0.149	0.366	FALSE	FALSE	FALSE	0	Glyoxylate reductase/hydroxypyruvate reductase
HSPD1	P10809	0.851	0.149	0.366	FALSE	FALSE	FALSE	0	60 kDa heat shock protein, mitochondrial
PPP2R1A	P30153	-1.41	0.149	0.366	FALSE	FALSE	TRUE	4	Serine/threonine-protein phosphatase 2A 65 kDa regulatory subunit A alpha isoform
ARHGAP18	Q8N392	-0.477	0.151	0.369	FALSE	FALSE	FALSE	0	Rho GTPase-activating protein 18
HIST1H2AJ	Q99878	-0.673	0.151	0.369	FALSE	FALSE	FALSE	0	Histone H2A type 1-J;Histone H2A type 1-H;Histone H2A.J;Histone H2A type 2-C;Histone H2A type 1-C;Histone H2A type 3;Histone H2A type 2-A;Histone H2A type 1-D;Histone H2A type 1;Histone H2A type 1-B/E;Histone H2A.V;Histone H2A.Z;Histone H2A type 2-B;Histone H2A type 1-A;Histone H2AX
RPL12	P30050	0.415	0.155	0.376	FALSE	FALSE	FALSE	0	60S ribosomal protein L12
LEMD3	Q9Y2U8	-0.424	0.155	0.378	FALSE	FALSE	TRUE	1	Inner nuclear membrane protein Man1
PDXK	O00764	-0.885	0.156	0.378	FALSE	FALSE	FALSE	0	Pyridoxal kinase
CAST	P20810	-0.301	0.157	0.378	FALSE	FALSE	FALSE	0	Calpastatin
YBX1	P67809	0.392	0.157	0.378	FALSE	FALSE	FALSE	0	Nuclease-sensitive element-binding protein 1
PDLIM5	Q96HC4	-1.38	0.159	0.383	FALSE	FALSE	TRUE	1	PDZ and LIM domain protein 5
ENOPH1	Q9UHY7	-1.8	0.165	0.396	FALSE	FALSE	TRUE	1	Enolase-phosphatase E1
LDHB	P07195	-0.322	0.166	0.396	FALSE	FALSE	FALSE	0	L-lactate dehydrogenase B chain
TAGLN2	P37802	-0.826	0.166	0.396	FALSE	FALSE	FALSE	0	Transgelin-2
ITGB2	P05107	-0.716	0.167	0.397	FALSE	FALSE	TRUE	2	Integrin beta-2
SH3BGRL3	Q9H299	1.13	0.167	0.397	FALSE	FALSE	TRUE	1	SH3 domain-binding glutamic acid-rich-like protein 3
EPB41	P11171	-0.313	0.169	0.4	FALSE	FALSE	FALSE	0	Protein 4.1
MT1F	P04733	-0.625	0.171	0.402	FALSE	FALSE	FALSE	0	Metallothionein-1F
MYL6	P60660	-0.314	0.171	0.402	FALSE	FALSE	FALSE	0	Myosin light polypeptide 6
LAMTOR5	O43504	-0.684	0.172	0.402	FALSE	FALSE	FALSE	0	Ragulator complex protein LAMTOR5
SUPT6H	Q7KZ85	0.56	0.172	0.402	FALSE	FALSE	TRUE	4	Transcription elongation factor SPT6
PTGES3	Q15185	0.526	0.175	0.407	FALSE	FALSE	FALSE	0	Prostaglandin E synthase 3
GDI2	P50395	-0.458	0.179	0.415	FALSE	FALSE	FALSE	0	Rab GDP dissociation inhibitor beta
PSMB1	P20618	0.316	0.179	0.415	FALSE	FALSE	FALSE	0	Proteasome subunit beta type-1
CTSS	P25774	-0.322	0.181	0.42	FALSE	FALSE	FALSE	0	Cathepsin S
HNRNPK	P61978	-0.39	0.183	0.423	FALSE	FALSE	FALSE	0	Heterogeneous nuclear ribonucleoprotein K
TMSB15B	P0CG35	-0.338	0.184	0.423	FALSE	FALSE	FALSE	0	Thymosin beta-15B;Thymosin beta-15A
GMPR	P36959	-0.566	0.185	0.424	FALSE	FALSE	FALSE	0	GMP reductase 1
PTRHD1	Q6GMV3	0.487	0.187	0.428	FALSE	FALSE	FALSE	0	Putative peptidyl-tRNA hydrolase PTRHD1
TCEAL3	Q969E4	-0.452	0.189	0.43	FALSE	FALSE	FALSE	0	Transcription elongation factor A protein-like 3
YWHAZ	P63104	-0.341	0.189	0.43	FALSE	FALSE	FALSE	0	14-3-3 protein zeta/delta
PPP2R4	Q15257	-1.14	0.19	0.43	FALSE	FALSE	TRUE	4	Serine/threonine-protein phosphatase 2A activator
SRRM1	Q8IYB3	-0.317	0.19	0.43	FALSE	FALSE	FALSE	0	Serine/arginine repetitive matrix protein 1
APEX1	P27695	-0.4	0.191	0.43	FALSE	FALSE	FALSE	0	DNA-(apurinic or apyrimidinic site) lyase;DNA-(apurinic or apyrimidinic site) lyase, mitochondrial
RPS17	P08708	-0.525	0.191	0.43	FALSE	FALSE	FALSE	0	40S ribosomal protein S17
RTN4	Q9NQC3	-0.311	0.192	0.432	FALSE	FALSE	FALSE	0	Reticulon-4
NOTCH1	P46531	1.29	0.195	0.437	FALSE	FALSE	TRUE	1	Neurogenic locus notch homolog protein 1;Notch 1 extracellular truncation;Notch 1 intracellular domain
CYCS	P99999	-0.353	0.196	0.437	FALSE	FALSE	FALSE	0	Cytochrome c
2009-09-01	Q9UHD8	-0.658	0.197	0.44	FALSE	FALSE	TRUE	1	Septin-9
HMGN2	P05204	0.399	0.2	0.441	FALSE	FALSE	FALSE	0	Non-histone chromosomal protein HMG-17;High mobility group nucleosome-binding domain-containing protein 3
HSPA5	P11021	0.552	0.2	0.441	FALSE	FALSE	FALSE	0	78 kDa glucose-regulated protein
MAPRE1	Q15691	-0.63	0.2	0.441	FALSE	FALSE	TRUE	1	Microtubule-associated protein RP/EB family member 1
CARS	P49589	-0.835	0.201	0.441	FALSE	FALSE	TRUE	4	Cysteine--tRNA ligase, cytoplasmic
P0DP25	P0DP25	-0.467	0.201	0.441	FALSE	FALSE	FALSE	0
PPIB	P23284	0.401	0.201	0.441	FALSE	FALSE	FALSE	0	Peptidyl-prolyl cis-trans isomerase B
DBI	P07108	0.44	0.202	0.441	FALSE	FALSE	FALSE	0	Acyl-CoA-binding protein
YARS	P54577	0.38	0.202	0.441	FALSE	FALSE	FALSE	0	Tyrosine--tRNA ligase, cytoplasmic;Tyrosine--tRNA ligase, cytoplasmic, N-terminally processed
FDPS	P14324	0.726	0.203	0.441	FALSE	FALSE	FALSE	0	Farnesyl pyrophosphate synthase
LTV1	Q96GA3	0.861	0.203	0.441	FALSE	FALSE	TRUE	4	Protein LTV1 homolog
RPSA	P08865	-0.43	0.204	0.442	FALSE	FALSE	FALSE	0	40S ribosomal protein SA
SET	Q01105	0.312	0.205	0.443	FALSE	FALSE	FALSE	0	Protein SET
TOP2A	P11388	0.442	0.205	0.443	FALSE	FALSE	FALSE	0	DNA topoisomerase 2-alpha
NSFL1C	Q9UNZ2	-0.4	0.208	0.446	FALSE	FALSE	FALSE	0	NSFL1 cofactor p47
PYGB	P11216	-1.16	0.209	0.449	FALSE	FALSE	TRUE	4	Glycogen phosphorylase, brain form
SDCBP	O00560	0.425	0.21	0.45	FALSE	FALSE	FALSE	0	Syntenin-1
PA2G4	Q9UQ80	-0.284	0.211	0.45	FALSE	FALSE	FALSE	0	Proliferation-associated protein 2G4
GGCT	O75223	0.7	0.212	0.45	FALSE	FALSE	TRUE	4	Gamma-glutamylcyclotransferase
PPP2CA	P67775	-0.499	0.212	0.45	FALSE	FALSE	FALSE	0	Serine/threonine-protein phosphatase 2A catalytic subunit alpha isoform;Serine/threonine-protein phosphatase 2A catalytic subunit beta isoform
U2AF1	P0DN76	0.839	0.212	0.45	FALSE	FALSE	TRUE	4	Splicing factor U2AF 35 kDa subunit;Splicing factor U2AF 26 kDa subunit
TSN	Q15631	1.19	0.214	0.451	FALSE	FALSE	TRUE	1	Translin
GNPDA2	Q8TDQ7	-1.21	0.215	0.451	FALSE	FALSE	TRUE	4	Glucosamine-6-phosphate isomerase 2
P4HB	P07237	0.323	0.215	0.451	FALSE	FALSE	FALSE	0	Protein disulfide-isomerase
ACTL6A	O96019	-0.353	0.216	0.451	FALSE	FALSE	FALSE	0	Actin-like protein 6A
DDX17	Q92841	0.372	0.216	0.451	FALSE	FALSE	FALSE	0	Probable ATP-dependent RNA helicase DDX17
SMPD3	Q9NY59	-0.73	0.216	0.451	FALSE	FALSE	TRUE	3	Sphingomyelin phosphodiesterase 3
DDX21	Q9NR30	0.547	0.217	0.452	FALSE	FALSE	FALSE	0	Nucleolar RNA helicase 2
FLNB	O75369	1.01	0.219	0.455	FALSE	FALSE	TRUE	1	Filamin-B
IGFBP7	Q16270	-0.958	0.219	0.455	FALSE	FALSE	TRUE	1	Insulin-like growth factor-binding protein 7
NME1	P15531	-0.327	0.22	0.455	FALSE	FALSE	FALSE	0	Nucleoside diphosphate kinase A
RAB11B	Q15907	-0.575	0.221	0.455	FALSE	FALSE	FALSE	0	Ras-related protein Rab-11B;Ras-related protein Rab-11A
CAPN1	P07384	-0.639	0.222	0.455	FALSE	FALSE	TRUE	4	Calpain-1 catalytic subunit
DARS	P14868	1.29	0.222	0.455	FALSE	FALSE	TRUE	1	Aspartate--tRNA ligase, cytoplasmic
RCN1	Q15293	-0.36	0.222	0.455	FALSE	FALSE	FALSE	0	Reticulocalbin-1
SHISA5	Q8N114	-0.756	0.222	0.455	FALSE	FALSE	FALSE	0	Protein shisa-5
TMOD3	Q9NYL9	-0.584	0.224	0.458	FALSE	FALSE	TRUE	4	Tropomodulin-3
CBR1	P16152	-0.271	0.227	0.463	FALSE	FALSE	FALSE	0	Carbonyl reductase [NADPH] 1
LCP2	Q13094	-0.339	0.229	0.463	FALSE	FALSE	FALSE	0	Lymphocyte cytosolic protein 2
PSMB5	P28074	0.36	0.229	0.463	FALSE	FALSE	FALSE	0	Proteasome subunit beta type-5
G3BP1	Q13283	-0.327	0.229	0.464	FALSE	FALSE	FALSE	0	Ras GTPase-activating protein-binding protein 1
LDLR	P01130	0.335	0.23	0.464	FALSE	FALSE	FALSE	0	Low-density lipoprotein receptor
HSBP1	O75506	-1.16	0.232	0.467	FALSE	FALSE	TRUE	4	Heat shock factor-binding protein 1
PSMA7	O14818	-0.289	0.233	0.467	FALSE	FALSE	FALSE	0	Proteasome subunit alpha type-7
EIF2S2	P20042	-0.273	0.235	0.47	FALSE	FALSE	FALSE	0	Eukaryotic translation initiation factor 2 subunit 2
PDIA3	P30101	-0.278	0.238	0.475	FALSE	FALSE	FALSE	0	Protein disulfide-isomerase A3
IDH2	P48735	0.474	0.24	0.479	FALSE	FALSE	FALSE	0	Isocitrate dehydrogenase [NADP], mitochondrial
SSRP1	Q08945	-0.95	0.243	0.484	FALSE	FALSE	TRUE	4	FACT complex subunit SSRP1
PPA2	Q9H2U2	-0.803	0.245	0.486	FALSE	FALSE	TRUE	4	Inorganic pyrophosphatase 2, mitochondrial
ADK	P55263	-0.29	0.246	0.486	FALSE	FALSE	FALSE	0	Adenosine kinase
OTUB1	Q96FW1	-0.835	0.246	0.486	FALSE	FALSE	TRUE	1	Ubiquitin thioesterase OTUB1
RPL7	P18124	0.52	0.248	0.488	FALSE	FALSE	FALSE	0	60S ribosomal protein L7
UBE2L3	P68036	-1.26	0.248	0.488	FALSE	FALSE	TRUE	4	Ubiquitin-conjugating enzyme E2 L3
PGAM1	P18669	-0.425	0.249	0.489	FALSE	FALSE	FALSE	0	Phosphoglycerate mutase 1
SMS	P52788	-0.68	0.254	0.497	FALSE	FALSE	TRUE	4	Spermine synthase
RCN2	Q14257	-0.66	0.255	0.499	FALSE	FALSE	TRUE	4	Reticulocalbin-2
QPRT	Q15274	-0.366	0.258	0.503	FALSE	FALSE	FALSE	0	Nicotinate-nucleotide pyrophosphorylase [carboxylating]
KTN1	Q86UP2	-0.236	0.259	0.503	FALSE	FALSE	FALSE	0	Kinectin
SKP1	P63208	-0.291	0.259	0.503	FALSE	FALSE	FALSE	0	S-phase kinase-associated protein 1
CCDC124	Q96CT7	-0.53	0.262	0.505	FALSE	FALSE	TRUE	3	Coiled-coil domain-containing protein 124
EIF4H	Q15056	0.595	0.262	0.505	FALSE	FALSE	FALSE	0	Eukaryotic translation initiation factor 4H
GM2A	P17900	0.794	0.262	0.505	FALSE	FALSE	FALSE	0	Ganglioside GM2 activator;Ganglioside GM2 activator isoform short
TPI1	P60174	0.411	0.263	0.506	FALSE	FALSE	FALSE	0	Triosephosphate isomerase
PTPRS	Q13332	0.342	0.264	0.507	FALSE	FALSE	FALSE	0	Receptor-type tyrosine-protein phosphatase S
RPLP2	P05387	0.331	0.266	0.508	FALSE	FALSE	FALSE	0	60S acidic ribosomal protein P2
DLD	P09622	-0.301	0.267	0.51	FALSE	FALSE	FALSE	0	Dihydrolipoyl dehydrogenase, mitochondrial
PSMB3	P49720	-0.282	0.268	0.511	FALSE	FALSE	FALSE	0	Proteasome subunit beta type-3
UBA1	P22314	1.74	0.271	0.515	FALSE	FALSE	TRUE	1	Ubiquitin-like modifier-activating enzyme 1
PEA15	Q15121	-0.894	0.272	0.516	FALSE	FALSE	TRUE	4	Astrocytic phosphoprotein PEA-15
CCT4	P50991	1.3	0.278	0.526	FALSE	FALSE	TRUE	1	T-complex protein 1 subunit delta
GAPDH	P04406	0.318	0.282	0.531	FALSE	FALSE	FALSE	0	Glyceraldehyde-3-phosphate dehydrogenase
TMPO	P42167	-0.227	0.282	0.531	FALSE	FALSE	FALSE	0	Lamina-associated polypeptide 2, isoforms beta/gamma;Thymopoietin;Thymopentin
HMGA1	P17096	-0.33	0.283	0.531	FALSE	FALSE	FALSE	0	High mobility group protein HMG-I/HMG-Y
NUCB1	Q02818	0.345	0.283	0.531	FALSE	FALSE	FALSE	0	Nucleobindin-1
BCLAF1	Q9NYF8	-0.26	0.284	0.532	FALSE	FALSE	FALSE	0	Bcl-2-associated transcription factor 1
GALNS	P34059	-0.596	0.285	0.532	FALSE	FALSE	TRUE	4	N-acetylgalactosamine-6-sulfatase
HLA-C	P10321	-0.306	0.285	0.532	FALSE	FALSE	FALSE	0	HLA class I histocompatibility antigen, Cw-7 alpha chain;HLA class I histocompatibility antigen, Cw-6 alpha chain;HLA class I histocompatibility antigen, Cw-12 alpha chain;HLA class I histocompatibility antigen, Cw-15 alpha chain;HLA class I histocompatibility antigen, Cw-8 alpha chain;HLA class I histocompatibility antigen, Cw-2 alpha chain;HLA class I histocompatibility antigen, Cw-14 alpha cha…
GARS	P41250	-0.444	0.287	0.533	FALSE	FALSE	FALSE	0	Glycine--tRNA ligase
ATIC	P31939	-0.235	0.289	0.534	FALSE	FALSE	FALSE	0	Bifunctional purine biosynthesis protein PURH;Phosphoribosylaminoimidazolecarboxamide formyltransferase;IMP cyclohydrolase
COX17	Q14061	-1.22	0.289	0.534	FALSE	FALSE	TRUE	1	Cytochrome c oxidase copper chaperone
EIF3D	O15371	-0.282	0.289	0.534	FALSE	FALSE	FALSE	0	Eukaryotic translation initiation factor 3 subunit D
TWF2	Q6IBS0	1.17	0.289	0.534	FALSE	FALSE	TRUE	1	Twinfilin-2
MSN	P26038	-0.456	0.291	0.535	FALSE	FALSE	FALSE	0	Moesin
XPNPEP1	Q9NQW7	-0.256	0.291	0.535	FALSE	FALSE	FALSE	0	Xaa-Pro aminopeptidase 1
TCOF1	Q13428	-0.283	0.292	0.535	FALSE	FALSE	FALSE	0	Treacle protein
PYCARD	Q9ULZ3	0.501	0.294	0.537	FALSE	FALSE	TRUE	4	Apoptosis-associated speck-like protein containing a CARD
RBMXL1	Q96E39	-0.674	0.294	0.537	FALSE	FALSE	FALSE	0	RNA binding motif protein, X-linked-like-1;RNA-binding motif protein, X chromosome;RNA-binding motif protein, X chromosome, N-terminally processed
CHCHD4	Q8N4Q1	-0.328	0.295	0.537	FALSE	FALSE	FALSE	0	Mitochondrial intermembrane space import and assembly protein 40
RPS3	P23396	0.23	0.296	0.537	FALSE	FALSE	FALSE	0	40S ribosomal protein S3
TPM3	P06753	-0.313	0.296	0.537	FALSE	FALSE	FALSE	0	Tropomyosin alpha-3 chain
SUB1	P53999	0.3	0.298	0.539	FALSE	FALSE	FALSE	0	Activated RNA polymerase II transcriptional coactivator p15
TXN2	Q99757	-0.305	0.299	0.539	FALSE	FALSE	FALSE	0	Thioredoxin, mitochondrial
COPE	O14579	-0.302	0.301	0.539	FALSE	FALSE	TRUE	1	Coatomer subunit epsilon
EIF3A	Q14152	0.347	0.301	0.539	FALSE	FALSE	FALSE	0	Eukaryotic translation initiation factor 3 subunit A
ILF3	Q12906	-0.692	0.301	0.539	FALSE	FALSE	TRUE	1	Interleukin enhancer-binding factor 3
KIT	P10721	0.252	0.303	0.539	FALSE	FALSE	FALSE	0	Mast/stem cell growth factor receptor Kit
AHNAK	Q09666	-0.231	0.304	0.539	FALSE	FALSE	FALSE	0	Neuroblast differentiation-associated protein AHNAK
DDB1	Q16531	-0.222	0.304	0.539	FALSE	FALSE	FALSE	0	DNA damage-binding protein 1
PDS5A	Q29RF7	-0.308	0.304	0.539	FALSE	FALSE	FALSE	0	Sister chromatid cohesion protein PDS5 homolog A
SERBP1	Q8NC51	-0.304	0.304	0.539	FALSE	FALSE	FALSE	0	Plasminogen activator inhibitor 1 RNA-binding protein
SZRD1	Q7Z422	-0.311	0.304	0.539	FALSE	FALSE	FALSE	0	SUZ domain-containing protein 1
HIST1H4A	P62805	-0.271	0.305	0.539	FALSE	FALSE	FALSE	0	Histone H4
IMPDH2	P12268	-0.892	0.306	0.539	FALSE	FALSE	TRUE	3	Inosine-5-monophosphate dehydrogenase 2
HIST2H3A	Q71DI3	-1.27	0.307	0.539	FALSE	FALSE	TRUE	4	Histone H3.2;Histone H3.1t;Histone H3.3;Histone H3.1;Histone H3.3C
THRAP3	Q9Y2W1	-0.366	0.307	0.539	FALSE	FALSE	FALSE	0	Thyroid hormone receptor-associated protein 3
HIST1H2BL	Q99880	0.699	0.308	0.539	FALSE	FALSE	TRUE	1	Histone H2B type 1-L;Histone H2B type 1-M;Histone H2B type 1-N;Histone H2B type 1-H;Histone H2B type 2-F;Histone H2B type 2-E;Histone H2B type 1-C/E/F/G/I;Histone H2B type 1-D;Histone H2B type F-S;Histone H2B type 1-B;Histone H2B type 1-O;Histone H2B type 1-J;Histone H2B type 1-K;Histone H2B type 1-A;Histone H2B type 3-B
SH3BGRL	O75368	-0.26	0.308	0.539	FALSE	FALSE	FALSE	0	SH3 domain-binding glutamic acid-rich-like protein
ELF1	P32519	-0.692	0.309	0.539	FALSE	FALSE	TRUE	1	ETS-related transcription factor Elf-1
PSMD1	Q99460	-0.417	0.309	0.539	FALSE	FALSE	FALSE	0	26S proteasome non-ATPase regulatory subunit 1
HSPA4	P34932	-0.245	0.311	0.541	FALSE	FALSE	FALSE	0	Heat shock 70 kDa protein 4
GLUL	P15104	0.863	0.312	0.541	FALSE	FALSE	TRUE	1	Glutamine synthetase
RPL19	P84098	-0.589	0.313	0.541	FALSE	FALSE	TRUE	4	60S ribosomal protein L19
RPL27	P61353	0.279	0.313	0.541	FALSE	FALSE	FALSE	0	60S ribosomal protein L27
RPS21	P63220	0.262	0.313	0.541	FALSE	FALSE	FALSE	0	40S ribosomal protein S21
COPA	P53621	-0.776	0.314	0.541	FALSE	FALSE	TRUE	4	Coatomer subunit alpha;Xenin;Proxenin
PPIF	P30405	-0.342	0.316	0.544	FALSE	FALSE	FALSE	0	Peptidyl-prolyl cis-trans isomerase F, mitochondrial
GYG1	P46976	-0.768	0.319	0.548	FALSE	FALSE	TRUE	4	Glycogenin-1
FNTA	P49354	-0.867	0.32	0.548	FALSE	FALSE	TRUE	4	Protein farnesyltransferase/geranylgeranyltransferase type-1 subunit alpha
FLT1	P17948	0.498	0.321	0.548	FALSE	FALSE	TRUE	4	Vascular endothelial growth factor receptor 1
PAG1	Q9NWQ8	-0.582	0.322	0.548	FALSE	FALSE	TRUE	4	Phosphoprotein associated with glycosphingolipid-enriched microdomains 1
TUBB4B	P68371	0.566	0.322	0.548	FALSE	FALSE	FALSE	0	Tubulin beta-4B chain;Tubulin beta-4A chain;Tubulin beta-2B chain;Tubulin beta-2A chain
PSMA2	P25787	-0.3	0.324	0.552	FALSE	FALSE	FALSE	0	Proteasome subunit alpha type-2
RPL23A	P62750	0.643	0.326	0.553	FALSE	FALSE	FALSE	0	60S ribosomal protein L23a
LAT	O43561	0.766	0.327	0.553	FALSE	FALSE	TRUE	1	Linker for activation of T-cells family member 1
METAP2	P50579	-0.317	0.327	0.553	FALSE	FALSE	FALSE	0	Methionine aminopeptidase 2
NAP1L4	Q99733	-1.25	0.328	0.554	FALSE	FALSE	TRUE	3	Nucleosome assembly protein 1-like 4
HADH	Q16836	1.33	0.33	0.556	FALSE	FALSE	TRUE	1	Hydroxyacyl-coenzyme A dehydrogenase, mitochondrial
MVD	P53602	-0.243	0.332	0.557	FALSE	FALSE	FALSE	0	Diphosphomevalonate decarboxylase
VPS35	Q96QK1	-0.791	0.332	0.557	FALSE	FALSE	TRUE	1	Vacuolar protein sorting-associated protein 35
DEK	P35659	0.233	0.333	0.557	FALSE	FALSE	FALSE	0	Protein DEK
EIF5B	O60841	-0.242	0.334	0.557	FALSE	FALSE	FALSE	0	Eukaryotic translation initiation factor 5B
MARK2	Q7KZI7	0.34	0.334	0.557	FALSE	FALSE	FALSE	0	Serine/threonine-protein kinase MARK2
G3BP2	Q9UN86	0.471	0.336	0.558	FALSE	FALSE	TRUE	1	Ras GTPase-activating protein-binding protein 2
WAS	P42768	0.317	0.337	0.559	FALSE	FALSE	FALSE	0	Wiskott-Aldrich syndrome protein
RPL18	Q07020	0.338	0.338	0.56	FALSE	FALSE	FALSE	0	60S ribosomal protein L18
SERPINB1	P30740	-0.23	0.339	0.56	FALSE	FALSE	FALSE	0	Leukocyte elastase inhibitor
ACO2	Q99798	0.282	0.344	0.567	FALSE	FALSE	FALSE	0	Aconitate hydratase, mitochondrial
PDXP	Q96GD0	-0.531	0.344	0.567	FALSE	FALSE	FALSE	0	Pyridoxal phosphate phosphatase
NADSYN1	Q6IA69	-0.267	0.345	0.567	FALSE	FALSE	FALSE	0	Glutamine-dependent NAD(+) synthetase
NCL	P19338	0.26	0.346	0.568	FALSE	FALSE	FALSE	0	Nucleolin
RAD23B	P54727	-0.291	0.347	0.568	FALSE	FALSE	FALSE	0	UV excision repair protein RAD23 homolog B
EPRS	P07814	0.237	0.348	0.569	FALSE	FALSE	FALSE	0	Bifunctional glutamate/proline--tRNA ligase;Glutamate--tRNA ligase;Proline--tRNA ligase
DKC1	O60832	-0.301	0.349	0.57	FALSE	FALSE	FALSE	0	H/ACA ribonucleoprotein complex subunit 4
NPC2	P61916	0.26	0.35	0.57	FALSE	FALSE	FALSE	0	Epididymal secretory protein E1
HMGN5	P82970	-0.278	0.351	0.57	FALSE	FALSE	FALSE	0	High mobility group nucleosome-binding domain-containing protein 5
SARS	P49591	-0.756	0.353	0.572	FALSE	FALSE	TRUE	4	Serine--tRNA ligase, cytoplasmic
SYNCRIP	O60506	-0.303	0.353	0.572	FALSE	FALSE	FALSE	0	Heterogeneous nuclear ribonucleoprotein Q
RPL8	P62917	-0.724	0.355	0.573	FALSE	FALSE	FALSE	0	60S ribosomal protein L8
TXNRD1	Q16881	-0.651	0.355	0.573	FALSE	FALSE	FALSE	0	Thioredoxin reductase 1, cytoplasmic
NPM3	O75607	0.301	0.356	0.574	FALSE	FALSE	FALSE	0	Nucleoplasmin-3
RPL6	Q02878	0.471	0.358	0.576	FALSE	FALSE	FALSE	0	60S ribosomal protein L6
SNRNP200	O75643	0.268	0.359	0.576	FALSE	FALSE	FALSE	0	U5 small nuclear ribonucleoprotein 200 kDa helicase
DDAH2	O95865	-0.31	0.361	0.579	FALSE	FALSE	TRUE	4	N(G),N(G)-dimethylarginine dimethylaminohydrolase 2
BIN2	Q9UBW5	-0.237	0.363	0.581	FALSE	FALSE	FALSE	0	Bridging integrator 2
ALDH9A1	P49189	0.256	0.368	0.587	FALSE	FALSE	FALSE	0	4-trimethylaminobutyraldehyde dehydrogenase
TUBB8	Q3ZCM7	-0.737	0.368	0.587	FALSE	FALSE	TRUE	4	Tubulin beta-8 chain
DDAH1	O94760	-0.243	0.373	0.594	FALSE	FALSE	FALSE	0	N(G),N(G)-dimethylarginine dimethylaminohydrolase 1
SMAP	O00193	0.212	0.374	0.594	FALSE	FALSE	FALSE	0	Small acidic protein
PABPN1	Q86U42	-0.192	0.375	0.594	FALSE	FALSE	FALSE	0	Polyadenylate-binding protein 2
RAD23A	P54725	-0.205	0.375	0.594	FALSE	FALSE	FALSE	0	UV excision repair protein RAD23 homolog A
IDI1	Q13907	-0.246	0.378	0.597	FALSE	FALSE	FALSE	0	Isopentenyl-diphosphate Delta-isomerase 1
RNH1	P13489	0.352	0.379	0.598	FALSE	FALSE	FALSE	0	Ribonuclease inhibitor
PSAT1	Q9Y617	0.199	0.38	0.598	FALSE	FALSE	FALSE	0	Phosphoserine aminotransferase
PDS5B	Q9NTI5	0.319	0.384	0.603	FALSE	FALSE	FALSE	0	Sister chromatid cohesion protein PDS5 homolog B
RPS14	P62263	0.185	0.384	0.603	FALSE	FALSE	FALSE	0	40S ribosomal protein S14
EIF3B	P55884	-0.209	0.385	0.603	FALSE	FALSE	FALSE	0	Eukaryotic translation initiation factor 3 subunit B
MAPRE2	Q15555	0.198	0.387	0.604	FALSE	FALSE	FALSE	0	Microtubule-associated protein RP/EB family member 2
CLIC1	O00299	-0.325	0.39	0.607	FALSE	FALSE	FALSE	0	Chloride intracellular channel protein 1
KHDRBS1	Q07666	-0.758	0.391	0.607	FALSE	FALSE	TRUE	2	KH domain-containing, RNA-binding, signal transduction-associated protein 1
LMAN2	Q12907	-0.469	0.391	0.607	FALSE	FALSE	FALSE	0	Vesicular integral-membrane protein VIP36
SRPR	P08240	0.282	0.391	0.607	FALSE	FALSE	FALSE	0	Signal recognition particle receptor subunit alpha
PPIA	P62937	0.231	0.395	0.611	FALSE	FALSE	FALSE	0	Peptidyl-prolyl cis-trans isomerase A;Peptidyl-prolyl cis-trans isomerase A, N-terminally processed
CALB2	P22676	0.247	0.397	0.611	FALSE	FALSE	FALSE	0	Calretinin
LDHA	P00338	-0.212	0.397	0.611	FALSE	FALSE	FALSE	0	L-lactate dehydrogenase A chain
GLUD1	P00367	0.26	0.398	0.611	FALSE	FALSE	FALSE	0	Glutamate dehydrogenase 1, mitochondrial
LGALS1	P09382	-0.171	0.398	0.611	FALSE	FALSE	FALSE	0	Galectin-1
ADAM10	O14672	0.176	0.399	0.611	FALSE	FALSE	FALSE	0	Disintegrin and metalloproteinase domain-containing protein 10
HSPH1	Q92598	-0.291	0.399	0.611	FALSE	FALSE	FALSE	0	Heat shock protein 105 kDa
GLO1	Q04760	-0.173	0.4	0.611	FALSE	FALSE	FALSE	0	Lactoylglutathione lyase
TIMP1	P01033	-0.329	0.407	0.621	FALSE	FALSE	FALSE	0	Metalloproteinase inhibitor 1
CNDP2	Q96KP4	-0.199	0.409	0.623	FALSE	FALSE	FALSE	0	Cytosolic non-specific dipeptidase
PSMB4	P28070	0.215	0.412	0.627	FALSE	FALSE	FALSE	0	Proteasome subunit beta type-4
CAPZB	P47756	0.74	0.413	0.627	FALSE	FALSE	TRUE	1	F-actin-capping protein subunit beta
NME2	P22392	0.245	0.415	0.629	FALSE	FALSE	FALSE	0	Nucleoside diphosphate kinase B;Putative nucleoside diphosphate kinase
P0DPI2	P0DPI2	0.206	0.416	0.629	FALSE	FALSE	FALSE	0
RENBP	P51606	0.179	0.416	0.629	FALSE	FALSE	FALSE	0	N-acylglucosamine 2-epimerase
RPLP1	P05386	-0.339	0.418	0.63	FALSE	FALSE	FALSE	0	60S acidic ribosomal protein P1
SARNP	P82979	-0.202	0.422	0.636	FALSE	FALSE	FALSE	0	SAP domain-containing ribonucleoprotein
EZR	P15311	-0.292	0.423	0.636	FALSE	FALSE	FALSE	0	Ezrin
CAP1	Q01518	0.239	0.424	0.636	FALSE	FALSE	FALSE	0	Adenylyl cyclase-associated protein 1
NOP56	O00567	0.309	0.427	0.639	FALSE	FALSE	FALSE	0	Nucleolar protein 56
ABCF1	Q8NE71	-0.175	0.429	0.641	FALSE	FALSE	FALSE	0	ATP-binding cassette sub-family F member 1
SART3	Q15020	-0.665	0.431	0.642	FALSE	FALSE	TRUE	1	Squamous cell carcinoma antigen recognized by T-cells 3
BTF3	P20290	-0.244	0.432	0.642	FALSE	FALSE	FALSE	0	Transcription factor BTF3
SIGLEC5	O15389	0.18	0.432	0.642	FALSE	FALSE	FALSE	0	Sialic acid-binding Ig-like lectin 5;Sialic acid-binding Ig-like lectin 14
U2SURP	O15042	0.348	0.434	0.644	FALSE	FALSE	FALSE	0	U2 snRNP-associated SURP motif-containing protein
ARHGAP30	Q7Z6I6	-0.234	0.435	0.644	FALSE	FALSE	FALSE	0	Rho GTPase-activating protein 30
EPB41L2	O43491	-0.198	0.436	0.644	FALSE	FALSE	FALSE	0	Band 4.1-like protein 2
PRMT5	O14744	0.417	0.438	0.647	FALSE	FALSE	FALSE	0	Protein arginine N-methyltransferase 5;Protein arginine N-methyltransferase 5, N-terminally processed
ACTG1	P63261	-0.228	0.439	0.648	FALSE	FALSE	FALSE	0	Actin, cytoplasmic 2;Actin, cytoplasmic 2, N-terminally processed
CORO1A	P31146	0.484	0.44	0.648	FALSE	FALSE	FALSE	0	Coronin-1A
DPYSL2	Q16555	-0.354	0.442	0.648	FALSE	FALSE	FALSE	0	Dihydropyrimidinase-related protein 2
OSBPL8	Q9BZF1	0.26	0.443	0.648	FALSE	FALSE	FALSE	0	Oxysterol-binding protein-related protein 8
RPL21	P46778	-0.225	0.443	0.648	FALSE	FALSE	FALSE	0	60S ribosomal protein L21
ADSS	P30520	-0.624	0.444	0.648	FALSE	FALSE	TRUE	2	Adenylosuccinate synthetase isozyme 2
NAP1L1	P55209	-0.261	0.444	0.648	FALSE	FALSE	FALSE	0	Nucleosome assembly protein 1-like 1
GANAB	Q14697	0.197	0.45	0.655	FALSE	FALSE	FALSE	0	Neutral alpha-glucosidase AB
WDR61	Q9GZS3	-0.216	0.45	0.655	FALSE	FALSE	FALSE	0	WD repeat-containing protein 61;WD repeat-containing protein 61, N-terminally processed
SF3B1	O75533	0.24	0.453	0.658	FALSE	FALSE	FALSE	0	Splicing factor 3B subunit 1
CCT3	P49368	0.351	0.456	0.66	FALSE	FALSE	FALSE	0	T-complex protein 1 subunit gamma
DPP3	Q9NY33	-0.207	0.456	0.66	FALSE	FALSE	FALSE	0	Dipeptidyl peptidase 3
EEF1A1	P68104	-0.676	0.458	0.662	FALSE	FALSE	FALSE	0	Elongation factor 1-alpha 1;Putative elongation factor 1-alpha-like 3
PLIN3	O60664	-0.323	0.461	0.666	FALSE	FALSE	TRUE	1	Perilipin-3
POLR2M	Q6EEV4	0.23	0.463	0.667	FALSE	FALSE	FALSE	0	DNA-directed RNA polymerase II subunit GRINL1A, isoforms 4/5
TPP1	O14773	-0.68	0.464	0.667	FALSE	FALSE	FALSE	0	Tripeptidyl-peptidase 1
RPS11	P62280	0.151	0.466	0.669	FALSE	FALSE	FALSE	0	40S ribosomal protein S11
PPIL3	Q9H2H8	-0.207	0.468	0.671	FALSE	FALSE	FALSE	0	Peptidyl-prolyl cis-trans isomerase-like 3
ACY1	Q03154	-0.175	0.469	0.671	FALSE	FALSE	FALSE	0	Aminoacylase-1
XRCC6	P12956	0.331	0.472	0.674	FALSE	FALSE	FALSE	0	X-ray repair cross-complementing protein 6
AK2	P54819	-0.32	0.48	0.684	FALSE	FALSE	FALSE	0	Adenylate kinase 2, mitochondrial;Adenylate kinase 2, mitochondrial, N-terminally processed
MDH1	P40925	-0.165	0.481	0.684	FALSE	FALSE	FALSE	0	Malate dehydrogenase, cytoplasmic
PAFAH1B1	P43034	-0.282	0.481	0.684	FALSE	FALSE	FALSE	0	Platelet-activating factor acetylhydrolase IB subunit alpha
NR2C2AP	Q86WQ0	-0.183	0.482	0.684	FALSE	FALSE	FALSE	0	Nuclear receptor 2C2-associated protein
LMNB1	P20700	-0.171	0.483	0.684	FALSE	FALSE	FALSE	0	Lamin-B1
IDH3A	P50213	-0.249	0.484	0.684	FALSE	FALSE	FALSE	0	Isocitrate dehydrogenase [NAD] subunit alpha, mitochondrial
DNMT1	P26358	0.261	0.485	0.684	FALSE	FALSE	FALSE	0	DNA (cytosine-5)-methyltransferase 1
GLOD4	Q9HC38	-0.636	0.486	0.685	FALSE	FALSE	TRUE	4	Glyoxalase domain-containing protein 4
C19orf43	Q9BQ61	-0.225	0.487	0.686	FALSE	FALSE	FALSE	0	Uncharacterized protein C19orf43
FAM49B	Q9NUQ9	0.212	0.488	0.686	FALSE	FALSE	FALSE	0	Protein FAM49B
NAMPT	P43490	-0.196	0.489	0.686	FALSE	FALSE	FALSE	0	Nicotinamide phosphoribosyltransferase
ENO1	P06733	-0.198	0.495	0.693	FALSE	FALSE	FALSE	0	Alpha-enolase
RPS4X	P62701	0.154	0.495	0.693	FALSE	FALSE	FALSE	0	40S ribosomal protein S4, X isoform
EEF1G	P26641	-0.196	0.498	0.696	FALSE	FALSE	FALSE	0	Elongation factor 1-gamma
LRRFIP1	Q32MZ4	-0.145	0.499	0.696	FALSE	FALSE	FALSE	0	Leucine-rich repeat flightless-interacting protein 1
SART1	O43290	0.226	0.503	0.7	FALSE	FALSE	FALSE	0	U4/U6.U5 tri-snRNP-associated protein 1
CSTB	P04080	0.174	0.504	0.701	FALSE	FALSE	FALSE	0	Cystatin-B
RPS18	P62269	0.4	0.505	0.701	FALSE	FALSE	FALSE	0	40S ribosomal protein S18
AGL	P35573	-0.184	0.506	0.701	FALSE	FALSE	FALSE	0	Glycogen debranching enzyme;4-alpha-glucanotransferase;Amylo-alpha-1,6-glucosidase
DIAPH1	O60610	-0.173	0.507	0.701	FALSE	FALSE	FALSE	0	Protein diaphanous homolog 1
IRF2BP2	Q7Z5L9	-0.143	0.516	0.71	FALSE	FALSE	FALSE	0	Interferon regulatory factor 2-binding protein 2
ZFP91	Q96JP5	0.245	0.516	0.71	FALSE	FALSE	FALSE	0	E3 ubiquitin-protein ligase ZFP91
CCT5	P48643	-0.466	0.517	0.71	FALSE	FALSE	FALSE	0	T-complex protein 1 subunit epsilon
OGFR	Q9NZT2	-0.149	0.517	0.71	FALSE	FALSE	FALSE	0	Opioid growth factor receptor
PIN1	Q13526	-0.213	0.52	0.713	FALSE	FALSE	FALSE	0	Peptidyl-prolyl cis-trans isomerase NIMA-interacting 1
C1QBP	Q07021	-0.185	0.521	0.713	FALSE	FALSE	FALSE	0	Complement component 1 Q subcomponent-binding protein, mitochondrial
RBBP4	Q09028	-0.201	0.521	0.713	FALSE	FALSE	FALSE	0	Histone-binding protein RBBP4
OXCT1	P55809	-0.157	0.529	0.721	FALSE	FALSE	FALSE	0	Succinyl-CoA:3-ketoacid coenzyme A transferase 1, mitochondrial
PGK1	P00558	0.23	0.529	0.721	FALSE	FALSE	FALSE	0	Phosphoglycerate kinase 1
GSR	P00390	-0.29	0.533	0.724	FALSE	FALSE	FALSE	0	Glutathione reductase, mitochondrial
PSMB2	P49721	0.151	0.533	0.724	FALSE	FALSE	FALSE	0	Proteasome subunit beta type-2
EFTUD2	Q15029	-0.415	0.534	0.724	FALSE	FALSE	TRUE	4	116 kDa U5 small nuclear ribonucleoprotein component
GSS	P48637	-0.168	0.536	0.725	FALSE	FALSE	FALSE	0	Glutathione synthetase
TXNDC12	O95881	-0.401	0.536	0.725	FALSE	FALSE	TRUE	4	Thioredoxin domain-containing protein 12
PFAS	O15067	-0.154	0.538	0.726	FALSE	FALSE	FALSE	0	Phosphoribosylformylglycinamidine synthase
VCP	P55072	0.312	0.538	0.726	FALSE	FALSE	FALSE	0	Transitional endoplasmic reticulum ATPase
HNRNPA3	P51991	0.236	0.543	0.731	FALSE	FALSE	FALSE	0	Heterogeneous nuclear ribonucleoprotein A3
CAPG	P40121	-0.398	0.544	0.732	FALSE	FALSE	FALSE	0	Macrophage-capping protein
PSMD4	P55036	-0.777	0.547	0.734	FALSE	FALSE	TRUE	4	26S proteasome non-ATPase regulatory subunit 4
PSMA6	P60900	0.144	0.549	0.736	FALSE	FALSE	FALSE	0	Proteasome subunit alpha type-6
INPP5D	Q92835	-0.161	0.554	0.741	FALSE	FALSE	FALSE	0	Phosphatidylinositol 3,4,5-trisphosphate 5-phosphatase 1
TLN1	Q9Y490	0.744	0.554	0.741	FALSE	FALSE	TRUE	1	Talin-1
NEDD8	Q15843	-0.183	0.557	0.742	FALSE	FALSE	FALSE	0	NEDD8
PFDN5	Q99471	0.226	0.558	0.742	FALSE	FALSE	TRUE	4	Prefoldin subunit 5
WARS	P23381	0.383	0.558	0.742	FALSE	FALSE	FALSE	0	Tryptophan--tRNA ligase, cytoplasmic;T1-TrpRS;T2-TrpRS
GLRX	P35754	-0.354	0.559	0.742	FALSE	FALSE	FALSE	0	Glutaredoxin-1
HIST1H1B	P16401	-0.226	0.559	0.742	FALSE	FALSE	FALSE	0	Histone H1.5
ARHGDIA	P52565	-0.199	0.562	0.744	FALSE	FALSE	FALSE	0	Rho GDP-dissociation inhibitor 1
OAT	P04181	0.188	0.565	0.746	FALSE	FALSE	FALSE	0	Ornithine aminotransferase, mitochondrial;Ornithine aminotransferase, hepatic form;Ornithine aminotransferase, renal form
PPP1CC	P36873	0.406	0.568	0.749	FALSE	FALSE	TRUE	1	Serine/threonine-protein phosphatase PP1-gamma catalytic subunit;Serine/threonine-protein phosphatase PP1-beta catalytic subunit;Serine/threonine-protein phosphatase PP1-alpha catalytic subunit
RPS27	P42677	0.285	0.568	0.749	FALSE	FALSE	FALSE	0	40S ribosomal protein S27
DENR	O43583	-0.232	0.569	0.749	FALSE	FALSE	FALSE	0	Density-regulated protein
ACLY	P53396	0.36	0.572	0.752	FALSE	FALSE	FALSE	0	ATP-citrate synthase
CASP3	P42574	0.125	0.574	0.753	FALSE	FALSE	FALSE	0	Caspase-3;Caspase-3 subunit p17;Caspase-3 subunit p12
NUCB2	P80303	-0.148	0.577	0.756	FALSE	FALSE	FALSE	0	Nucleobindin-2;Nesfatin-1
ARMT1	Q9H993	-0.142	0.58	0.758	FALSE	FALSE	FALSE	0	Protein-glutamate O-methyltransferase
CRIP2	P52943	-0.157	0.581	0.758	FALSE	FALSE	FALSE	0	Cysteine-rich protein 2
PTBP1	P26599	-0.471	0.581	0.758	FALSE	FALSE	TRUE	4	Polypyrimidine tract-binding protein 1
RRBP1	Q9P2E9	-0.112	0.582	0.758	FALSE	FALSE	FALSE	0	Ribosome-binding protein 1
PCNA	P12004	0.123	0.584	0.759	FALSE	FALSE	FALSE	0	Proliferating cell nuclear antigen
LSM4	Q9Y4Z0	-0.381	0.585	0.76	FALSE	FALSE	TRUE	4	U6 snRNA-associated Sm-like protein LSm4
ACOT1	Q86TX2	-0.306	0.589	0.764	FALSE	FALSE	TRUE	2	Acyl-coenzyme A thioesterase 1;Acyl-coenzyme A thioesterase 2, mitochondrial
YWHAB	P31946	0.153	0.59	0.764	FALSE	FALSE	FALSE	0	14-3-3 protein beta/alpha;14-3-3 protein beta/alpha, N-terminally processed
DCTPP1	Q9H773	0.184	0.592	0.764	FALSE	FALSE	FALSE	0	dCTP pyrophosphatase 1
PSAP	P07602	0.213	0.592	0.764	FALSE	FALSE	FALSE	0	Prosaposin;Saposin-A;Saposin-B-Val;Saposin-B;Saposin-C;Saposin-D
CSF1	P09603	-0.168	0.597	0.77	FALSE	FALSE	FALSE	0	Macrophage colony-stimulating factor 1;Processed macrophage colony-stimulating factor 1
RBBP7	Q16576	0.181	0.6	0.771	FALSE	FALSE	FALSE	0	Histone-binding protein RBBP7
DYNC1I2	Q13409	-0.105	0.601	0.772	FALSE	FALSE	FALSE	0	Cytoplasmic dynein 1 intermediate chain 2
IMPA1	P29218	-0.643	0.602	0.772	FALSE	FALSE	TRUE	4	Inositol monophosphatase 1
NOP58	Q9Y2X3	0.133	0.607	0.777	FALSE	FALSE	FALSE	0	Nucleolar protein 58
DIDO1	Q9BTC0	-0.391	0.612	0.781	FALSE	FALSE	TRUE	4	Death-inducer obliterator 1
ENSA	O43768	0.151	0.612	0.781	FALSE	FALSE	FALSE	0	Alpha-endosulfine
NPM1	P06748	0.148	0.613	0.781	FALSE	FALSE	FALSE	0	Nucleophosmin
RPS27A	P62979	0.131	0.614	0.781	FALSE	FALSE	FALSE	0	Ubiquitin-40S ribosomal protein S27a;Ubiquitin;40S ribosomal protein S27a;Ubiquitin-60S ribosomal protein L40;Ubiquitin;60S ribosomal protein L40;Polyubiquitin-B;Ubiquitin;Polyubiquitin-C;Ubiquitin
UBA2	Q9UBT2	-0.434	0.615	0.782	FALSE	FALSE	TRUE	1	SUMO-activating enzyme subunit 2
HNRNPDL	O14979	-0.299	0.618	0.784	FALSE	FALSE	TRUE	4	Heterogeneous nuclear ribonucleoprotein D-like
SORD	Q00796	-0.141	0.62	0.786	FALSE	FALSE	FALSE	0	Sorbitol dehydrogenase
CANX	P27824	-0.143	0.625	0.79	FALSE	FALSE	FALSE	0	Calnexin
HEXA	P06865	-0.112	0.625	0.79	FALSE	FALSE	FALSE	0	Beta-hexosaminidase subunit alpha
TPT1	P13693	0.156	0.626	0.79	FALSE	FALSE	FALSE	0	Translationally-controlled tumor protein
TPP2	P29144	-0.106	0.628	0.79	FALSE	FALSE	FALSE	0	Tripeptidyl-peptidase 2
EIF3G	O75821	-0.104	0.629	0.79	FALSE	FALSE	FALSE	0	Eukaryotic translation initiation factor 3 subunit G
PGD	P52209	0.107	0.629	0.79	FALSE	FALSE	FALSE	0	6-phosphogluconate dehydrogenase, decarboxylating
CAT	P04040	-0.127	0.631	0.791	FALSE	FALSE	FALSE	0	Catalase
PFN1	P07737	-0.162	0.634	0.791	FALSE	FALSE	FALSE	0	Profilin-1
SNRPD2	P62316	-0.15	0.634	0.791	FALSE	FALSE	FALSE	0	Small nuclear ribonucleoprotein Sm D2
APEH	P13798	-0.0997	0.635	0.791	FALSE	FALSE	FALSE	0	Acylamino-acid-releasing enzyme
PAK2	Q13177	-0.135	0.635	0.791	FALSE	FALSE	FALSE	0	Serine/threonine-protein kinase PAK 2;PAK-2p27;PAK-2p34
ACAT2	Q9BWD1	-0.29	0.637	0.791	FALSE	FALSE	FALSE	0	Acetyl-CoA acetyltransferase, cytosolic
SDF2L1	Q9HCN8	-0.405	0.637	0.791	FALSE	FALSE	TRUE	3	Stromal cell-derived factor 2-like protein 1
FASN	P49327	0.265	0.638	0.791	FALSE	FALSE	FALSE	0	Fatty acid synthase;[Acyl-carrier-protein] S-acetyltransferase;[Acyl-carrier-protein] S-malonyltransferase;3-oxoacyl-[acyl-carrier-protein] synthase;3-oxoacyl-[acyl-carrier-protein] reductase;3-hydroxyacyl-[acyl-carrier-protein] dehydratase;Enoyl-[acyl-carrier-protein] reductase;Oleoyl-[acyl-carrier-protein] hydrolase
GNB2L1	P63244	0.131	0.64	0.791	FALSE	FALSE	FALSE	0	Guanine nucleotide-binding protein subunit beta-2-like 1;Guanine nucleotide-binding protein subunit beta-2-like 1, N-terminally processed
RSL1D1	O76021	-0.509	0.64	0.791	FALSE	FALSE	TRUE	1	Ribosomal L1 domain-containing protein 1
SOD1	P00441	-0.119	0.64	0.791	FALSE	FALSE	FALSE	0	Superoxide dismutase [Cu-Zn]
HSPA9	P38646	0.123	0.641	0.791	FALSE	FALSE	FALSE	0	Stress-70 protein, mitochondrial
TXNDC17	Q9BRA2	-0.296	0.641	0.791	FALSE	FALSE	FALSE	0	Thioredoxin domain-containing protein 17
HSPB11	Q9Y547	0.122	0.643	0.792	FALSE	FALSE	FALSE	0	Intraflagellar transport protein 25 homolog
ARHGDIB	P52566	-0.21	0.645	0.793	FALSE	FALSE	FALSE	0	Rho GDP-dissociation inhibitor 2
ANP32A	P39687	0.116	0.646	0.793	FALSE	FALSE	FALSE	0	Acidic leucine-rich nuclear phosphoprotein 32 family member A
PABPC1	P11940	-0.158	0.646	0.793	FALSE	FALSE	FALSE	0	Polyadenylate-binding protein 1;Polyadenylate-binding protein 3
NAE1	Q13564	0.348	0.649	0.794	FALSE	FALSE	TRUE	3	NEDD8-activating enzyme E1 regulatory subunit
IGF2R	P11717	-0.137	0.65	0.794	FALSE	FALSE	FALSE	0	Cation-independent mannose-6-phosphate receptor
TXN	P10599	-0.177	0.652	0.794	FALSE	FALSE	FALSE	0	Thioredoxin
CLSTN3	Q9BQT9	0.423	0.653	0.794	FALSE	FALSE	TRUE	1	Calsyntenin-3
PPP1R2P3	Q6NXS1	0.158	0.653	0.794	FALSE	FALSE	FALSE	0	Protein phosphatase inhibitor 2-like protein 3;Protein phosphatase inhibitor 2
PPP4R2	Q9NY27	0.0982	0.653	0.794	FALSE	FALSE	FALSE	0	Serine/threonine-protein phosphatase 4 regulatory subunit 2
ANPEP	P15144	0.115	0.656	0.796	FALSE	FALSE	FALSE	0	Aminopeptidase N
PPP6R1	Q9UPN7	0.126	0.658	0.798	FALSE	FALSE	FALSE	0	Serine/threonine-protein phosphatase 6 regulatory subunit 1
HNRNPU	Q00839	0.0966	0.659	0.798	FALSE	FALSE	FALSE	0	Heterogeneous nuclear ribonucleoprotein U
HDDC3	Q8N4P3	-0.12	0.661	0.799	FALSE	FALSE	FALSE	0	Guanosine-3,5-bis(diphosphate) 3-pyrophosphohydrolase MESH1
NASP	P49321	-0.106	0.662	0.8	FALSE	FALSE	FALSE	0	Nuclear autoantigenic sperm protein
PRKCSH	P14314	0.0936	0.668	0.806	FALSE	FALSE	FALSE	0	Glucosidase 2 subunit beta
SERPINB6	P35237	-0.154	0.673	0.81	FALSE	FALSE	FALSE	0	Serpin B6
CMPK1	P30085	0.129	0.676	0.813	FALSE	FALSE	FALSE	0	UMP-CMP kinase
SEMA7A	O75326	0.118	0.677	0.813	FALSE	FALSE	FALSE	0	Semaphorin-7A
ACTR3	P61158	-0.201	0.678	0.813	FALSE	FALSE	FALSE	0	Actin-related protein 3
CRELD2	Q6UXH1	0.379	0.681	0.816	FALSE	FALSE	TRUE	4	Cysteine-rich with EGF-like domain protein 2
LSM3	P62310	-0.114	0.683	0.816	FALSE	FALSE	FALSE	0	U6 snRNA-associated Sm-like protein LSm3
NIFK	Q9BYG3	-0.131	0.684	0.816	FALSE	FALSE	TRUE	2	MKI67 FHA domain-interacting nucleolar phosphoprotein
AHCTF1	Q8WYP5	0.22	0.686	0.817	FALSE	FALSE	TRUE	3	Protein ELYS
EIF2A	Q9BY44	0.109	0.688	0.817	FALSE	FALSE	FALSE	0	Eukaryotic translation initiation factor 2A;Eukaryotic translation initiation factor 2A, N-terminally processed
RABL6	Q3YEC7	-0.258	0.688	0.817	FALSE	FALSE	TRUE	4	Rab-like protein 6
RPS5	P46782	-0.09	0.688	0.817	FALSE	FALSE	FALSE	0	40S ribosomal protein S5;40S ribosomal protein S5, N-terminally processed
ACTN4	O43707	0.266	0.69	0.818	FALSE	FALSE	FALSE	0	Alpha-actinin-4
PDHB	P11177	0.0903	0.691	0.818	FALSE	FALSE	FALSE	0	Pyruvate dehydrogenase E1 component subunit beta, mitochondrial
MTAP	Q13126	-0.271	0.692	0.818	FALSE	FALSE	TRUE	4	S-methyl-5-thioadenosine phosphorylase
TGOLN2	O43493	-0.259	0.692	0.818	FALSE	FALSE	TRUE	1	Trans-Golgi network integral membrane protein 2
SNRNP70	P08621	0.0838	0.698	0.823	FALSE	FALSE	FALSE	0	U1 small nuclear ribonucleoprotein 70 kDa
PNP	P00491	-0.1	0.699	0.823	FALSE	FALSE	FALSE	0	Purine nucleoside phosphorylase
CBX3	Q13185	-0.109	0.702	0.826	FALSE	FALSE	FALSE	0	Chromobox protein homolog 3
AKR1A1	P14550	-0.0951	0.704	0.827	FALSE	FALSE	FALSE	0	Alcohol dehydrogenase [NADP(+)]
PSMA3	P25788	0.107	0.707	0.828	FALSE	FALSE	FALSE	0	Proteasome subunit alpha type-3
SSB	P05455	-0.0874	0.707	0.828	FALSE	FALSE	FALSE	0	Lupus La protein
SNRPA	P09012	-0.0813	0.708	0.828	FALSE	FALSE	FALSE	0	U1 small nuclear ribonucleoprotein A
PNMA5	Q96PV4	-0.102	0.709	0.828	FALSE	FALSE	FALSE	0	Paraneoplastic antigen-like protein 5
PSMA1	P25786	0.135	0.713	0.831	FALSE	FALSE	FALSE	0	Proteasome subunit alpha type-1
TPM4	P67936	-0.0855	0.713	0.831	FALSE	FALSE	FALSE	0	Tropomyosin alpha-4 chain
FAH	P16930	-0.0911	0.719	0.837	FALSE	FALSE	FALSE	0	Fumarylacetoacetase
EIF4B	P23588	-0.107	0.721	0.838	FALSE	FALSE	FALSE	0	Eukaryotic translation initiation factor 4B
BANF1	O75531	0.0827	0.722	0.838	FALSE	FALSE	FALSE	0	Barrier-to-autointegration factor;Barrier-to-autointegration factor, N-terminally processed
CCT2	P78371	-0.273	0.724	0.839	FALSE	FALSE	FALSE	0	T-complex protein 1 subunit beta
RPS7	P62081	-0.232	0.733	0.849	FALSE	FALSE	FALSE	0	40S ribosomal protein S7
MTDH	Q86UE4	0.0856	0.736	0.851	FALSE	FALSE	FALSE	0	Protein LYRIC
PSMD11	O00231	-0.117	0.738	0.852	FALSE	FALSE	FALSE	0	26S proteasome non-ATPase regulatory subunit 11
PRRC2C	Q9Y520	-0.0664	0.742	0.855	FALSE	FALSE	FALSE	0	Protein PRRC2C
ALDH1B1	P30837	-0.295	0.749	0.863	FALSE	FALSE	TRUE	1	Aldehyde dehydrogenase X, mitochondrial
ALDOC	P09972	-0.0848	0.752	0.863	FALSE	FALSE	FALSE	0	Fructose-bisphosphate aldolase C
WDR1	O75083	0.0808	0.753	0.863	FALSE	FALSE	FALSE	0	WD repeat-containing protein 1
WIBG	Q9BRP8	-0.0935	0.753	0.863	FALSE	FALSE	FALSE	0	Partner of Y14 and mago
YWHAG	P61981	-0.0895	0.754	0.863	FALSE	FALSE	FALSE	0	14-3-3 protein gamma;14-3-3 protein gamma, N-terminally processed
TKT	P29401	-0.0809	0.759	0.868	FALSE	FALSE	FALSE	0	Transketolase
EPS15	P42566	0.174	0.76	0.869	FALSE	FALSE	TRUE	2	Epidermal growth factor receptor substrate 15
GRN	P28799	0.0821	0.763	0.87	FALSE	FALSE	FALSE	0	Granulins;Acrogranin;Paragranulin;Granulin-1;Granulin-2;Granulin-3;Granulin-4;Granulin-5;Granulin-6;Granulin-7
HPRT1	P00492	-0.169	0.766	0.873	FALSE	FALSE	FALSE	0	Hypoxanthine-guanine phosphoribosyltransferase
CCT7	Q99832	-0.228	0.777	0.884	FALSE	FALSE	FALSE	0	T-complex protein 1 subunit eta
CD99	P14209	-0.0671	0.78	0.886	FALSE	FALSE	FALSE	0	CD99 antigen
RCC2	Q9P258	-0.0672	0.78	0.886	FALSE	FALSE	FALSE	0	Protein RCC2
XRCC5	P13010	-0.159	0.782	0.886	FALSE	FALSE	FALSE	0	X-ray repair cross-complementing protein 5
PSMB8	P28062	0.0868	0.788	0.892	FALSE	FALSE	FALSE	0	Proteasome subunit beta type-8
EIF3I	Q13347	0.149	0.791	0.892	FALSE	FALSE	FALSE	0	Eukaryotic translation initiation factor 3 subunit I
G6PD	P11413	-0.112	0.791	0.892	FALSE	FALSE	FALSE	0	Glucose-6-phosphate 1-dehydrogenase
MAN2B1	O00754	0.0723	0.791	0.892	FALSE	FALSE	FALSE	0	Lysosomal alpha-mannosidase;Lysosomal alpha-mannosidase A peptide;Lysosomal alpha-mannosidase B peptide;Lysosomal alpha-mannosidase C peptide;Lysosomal alpha-mannosidase D peptide;Lysosomal alpha-mannosidase E peptide
NARS	O43776	-0.0987	0.796	0.896	FALSE	FALSE	FALSE	0	Asparagine--tRNA ligase, cytoplasmic
SEMA4D	Q92854	0.0779	0.798	0.897	FALSE	FALSE	FALSE	0	Semaphorin-4D
CAPZA1	P52907	0.13	0.799	0.897	FALSE	FALSE	FALSE	0	F-actin-capping protein subunit alpha-1
STMN1	P16949	-0.0895	0.8	0.897	FALSE	FALSE	FALSE	0	Stathmin
RPS12	P25398	-0.0994	0.806	0.903	FALSE	FALSE	TRUE	4	40S ribosomal protein S12
RNPEP	Q9H4A4	-0.0571	0.81	0.904	FALSE	FALSE	FALSE	0	Aminopeptidase B
SUMO2	P61956	0.134	0.81	0.904	FALSE	FALSE	FALSE	0	Small ubiquitin-related modifier 2;Small ubiquitin-related modifier 4
PSIP1	O75475	0.0727	0.811	0.904	FALSE	FALSE	FALSE	0	PC4 and SFRS1-interacting protein
QDPR	P09417	0.0758	0.811	0.904	FALSE	FALSE	FALSE	0	Dihydropteridine reductase
MTHFD1	P11586	-0.0548	0.812	0.904	FALSE	FALSE	FALSE	0	C-1-tetrahydrofolate synthase, cytoplasmic;Methylenetetrahydrofolate dehydrogenase;Methenyltetrahydrofolate cyclohydrolase;Formyltetrahydrofolate synthetase;C-1-tetrahydrofolate synthase, cytoplasmic, N-terminally processed
PGM2	Q96G03	0.104	0.815	0.906	FALSE	FALSE	FALSE	0	Phosphoglucomutase-2
HSPE1	P61604	0.053	0.818	0.908	FALSE	FALSE	FALSE	0	10 kDa heat shock protein, mitochondrial
ARPP19	P56211	-0.0747	0.825	0.915	FALSE	FALSE	FALSE	0	cAMP-regulated phosphoprotein 19
CKB	P12277	0.0476	0.826	0.915	FALSE	FALSE	FALSE	0	Creatine kinase B-type
GSTO1	P78417	-0.0746	0.829	0.917	FALSE	FALSE	FALSE	0	Glutathione S-transferase omega-1
CCT6A	P40227	-0.178	0.833	0.92	FALSE	FALSE	FALSE	0	T-complex protein 1 subunit zeta
MDC1	Q14676	0.0617	0.835	0.921	FALSE	FALSE	FALSE	0	Mediator of DNA damage checkpoint protein 1
EIF3M	Q7L2H7	0.131	0.838	0.921	FALSE	FALSE	TRUE	1	Eukaryotic translation initiation factor 3 subunit M
GRPEL1	Q9HAV7	0.0958	0.838	0.921	FALSE	FALSE	FALSE	0	GrpE protein homolog 1, mitochondrial
LCP1	P13796	0.0974	0.838	0.921	FALSE	FALSE	FALSE	0	Plastin-2
HMGB3	O15347	0.0577	0.844	0.925	FALSE	FALSE	FALSE	0	High mobility group protein B3
STX7	O15400	-0.134	0.844	0.925	FALSE	FALSE	TRUE	4	Syntaxin-7
BLVRB	P30043	0.0491	0.849	0.93	FALSE	FALSE	FALSE	0	Flavin reductase (NADPH)
VAPA	Q9P0L0	-0.077	0.852	0.932	FALSE	FALSE	FALSE	0	Vesicle-associated membrane protein-associated protein A
PARK7	Q99497	0.0485	0.857	0.935	FALSE	FALSE	FALSE	0	Protein deglycase DJ-1
SFPQ	P23246	0.0373	0.857	0.935	FALSE	FALSE	FALSE	0	Splicing factor, proline- and glutamine-rich
ESD	P10768	0.042	0.86	0.936	FALSE	FALSE	FALSE	0	S-formylglutathione hydrolase
RPL4	P36578	0.0409	0.86	0.936	FALSE	FALSE	FALSE	0	60S ribosomal protein L4
YBX3	P16989	-0.0707	0.863	0.937	FALSE	FALSE	FALSE	0	Y-box-binding protein 3
ACO1	P21399	0.0474	0.866	0.94	FALSE	FALSE	FALSE	0	Cytoplasmic aconitate hydratase
C11orf54	Q9H0W9	0.0441	0.869	0.941	FALSE	FALSE	FALSE	0	Ester hydrolase C11orf54
NUCKS1	Q9H1E3	-0.0437	0.869	0.941	FALSE	FALSE	FALSE	0	Nuclear ubiquitous casein and cyclin-dependent kinase substrate 1
IL1RL1	Q01638	0.0683	0.871	0.942	FALSE	FALSE	FALSE	0	Interleukin-1 receptor-like 1
POLR2H	P52434	0.148	0.872	0.942	FALSE	FALSE	TRUE	4	DNA-directed RNA polymerases I, II, and III subunit RPABC3
ACTN1	P12814	-0.23	0.878	0.945	FALSE	FALSE	TRUE	2	Alpha-actinin-1
FURIN	P09958	0.0406	0.878	0.945	FALSE	FALSE	FALSE	0	Furin
TARS	P26639	-0.0322	0.879	0.945	FALSE	FALSE	FALSE	0	Threonine--tRNA ligase, cytoplasmic
LMNA	P02545	-0.0307	0.884	0.948	FALSE	FALSE	FALSE	0	Prelamin-A/C;Lamin-A/C
ASAH1	Q13510	-0.0953	0.885	0.948	FALSE	FALSE	FALSE	0	Acid ceramidase;Acid ceramidase subunit alpha;Acid ceramidase subunit beta
HNRNPL	P14866	0.035	0.885	0.948	FALSE	FALSE	FALSE	0	Heterogeneous nuclear ribonucleoprotein L
STIP1	P31948	-0.0607	0.886	0.948	FALSE	FALSE	FALSE	0	Stress-induced-phosphoprotein 1
ILF2	Q12905	0.0826	0.887	0.948	FALSE	FALSE	TRUE	4	Interleukin enhancer-binding factor 2
CLTC	Q00610	-0.11	0.889	0.948	FALSE	FALSE	TRUE	2	Clathrin heavy chain 1
SDF4	Q9BRK5	-0.0518	0.889	0.948	FALSE	FALSE	FALSE	0	45 kDa calcium-binding protein
PSMC2	P35998	0.0475	0.893	0.951	FALSE	FALSE	TRUE	4	26S protease regulatory subunit 7
SUCLG2	Q96I99	-0.0385	0.894	0.952	FALSE	FALSE	FALSE	0	Succinyl-CoA ligase [GDP-forming] subunit beta, mitochondrial
BTF3L4	Q96K17	0.0316	0.898	0.952	FALSE	FALSE	FALSE	0	Transcription factor BTF3 homolog 4
SRSF7	Q16629	0.0419	0.899	0.952	FALSE	FALSE	FALSE	0	Serine/arginine-rich splicing factor 7
PRDX1	Q06830	0.101	0.9	0.952	FALSE	FALSE	FALSE	0	Peroxiredoxin-1
BABAM1	Q9NWV8	-0.0297	0.902	0.952	FALSE	FALSE	FALSE	0	BRISC and BRCA1-A complex member 1
C8G	P07360	0.0781	0.902	0.952	FALSE	FALSE	FALSE	0	Complement component C8 gamma chain
HN1L	Q9H910	-0.0286	0.902	0.952	FALSE	FALSE	FALSE	0	Hematological and neurological expressed 1-like protein
TCP1	P17987	-0.0579	0.902	0.952	FALSE	FALSE	FALSE	0	T-complex protein 1 subunit alpha
ARPC5	O15511	0.0438	0.905	0.954	FALSE	FALSE	FALSE	0	Actin-related protein 2/3 complex subunit 5
THOP1	P52888	0.0332	0.908	0.955	FALSE	FALSE	FALSE	0	Thimet oligopeptidase
PKM	P14618	-0.0554	0.91	0.955	FALSE	FALSE	FALSE	0	Pyruvate kinase PKM
BOLA2	Q9H3K6	-0.0395	0.911	0.955	FALSE	FALSE	FALSE	0	BolA-like protein 2
IQGAP1	P46940	0.0422	0.911	0.955	FALSE	FALSE	FALSE	0	Ras GTPase-activating-like protein IQGAP1
HSPA1B	P0DMV9	0.042	0.916	0.959	FALSE	FALSE	FALSE	0	Heat shock 70 kDa protein 1B;Heat shock 70 kDa protein 1A
HSPA8	P11142	-0.0201	0.918	0.96	FALSE	FALSE	FALSE	0	Heat shock cognate 71 kDa protein
PDIA4	P13667	0.0238	0.922	0.963	FALSE	FALSE	FALSE	0	Protein disulfide-isomerase A4
DDX6	P26196	0.0301	0.925	0.964	FALSE	FALSE	FALSE	0	Probable ATP-dependent RNA helicase DDX6
SAE1	Q9UBE0	0.0564	0.925	0.964	FALSE	FALSE	TRUE	2	SUMO-activating enzyme subunit 1;SUMO-activating enzyme subunit 1, N-terminally processed
ERH	P84090	0.0236	0.926	0.964	FALSE	FALSE	FALSE	0	Enhancer of rudimentary homolog
CALR	P27797	0.0225	0.927	0.964	FALSE	FALSE	FALSE	0	Calreticulin
MKI67	P46013	-0.0323	0.928	0.964	FALSE	FALSE	FALSE	0	Antigen KI-67
TPR	P12270	-0.0208	0.932	0.965	FALSE	FALSE	FALSE	0	Nucleoprotein TPR
UBE2I	P63279	0.0339	0.933	0.965	FALSE	FALSE	FALSE	0	SUMO-conjugating enzyme UBC9
TXNL1	O43396	-0.0361	0.934	0.965	FALSE	FALSE	FALSE	0	Thioredoxin-like protein 1
VASP	P50552	0.0272	0.934	0.965	FALSE	FALSE	FALSE	0	Vasodilator-stimulated phosphoprotein
CIAO1	O76071	0.0164	0.937	0.967	FALSE	FALSE	FALSE	0	Probable cytosolic iron-sulfur protein assembly protein CIAO1
SPINT1	O43278	-0.051	0.938	0.967	FALSE	FALSE	TRUE	4	Kunitz-type protease inhibitor 1
SUPT5H	O00267	0.0201	0.942	0.97	FALSE	FALSE	TRUE	2	Transcription elongation factor SPT5
PSMC4	P43686	0.0336	0.948	0.975	FALSE	FALSE	TRUE	4	26S protease regulatory subunit 6B
RFC1	P35251	0.045	0.95	0.975	FALSE	FALSE	TRUE	3	Replication factor C subunit 1
NT5C	Q8TCD5	-0.0193	0.953	0.977	FALSE	FALSE	FALSE	0	5(3)-deoxyribonucleotidase, cytosolic type
PSMA5	P28066	0.0109	0.963	0.986	FALSE	FALSE	FALSE	0	Proteasome subunit alpha type-5
TOP1	P11387	0.0124	0.963	0.986	FALSE	FALSE	FALSE	0	DNA topoisomerase 1
FLNA	P21333	0.0146	0.967	0.987	FALSE	FALSE	FALSE	0	Filamin-A
MYDGF	Q969H8	0.0133	0.967	0.987	FALSE	FALSE	FALSE	0	Myeloid-derived growth factor
NIT1	Q86X76	-0.00869	0.967	0.987	FALSE	FALSE	FALSE	0	Nitrilase homolog 1
CTSD	P07339	-0.0203	0.97	0.988	FALSE	FALSE	FALSE	0	Cathepsin D;Cathepsin D light chain;Cathepsin D heavy chain
PTMA	P06454	-0.0249	0.971	0.988	FALSE	FALSE	FALSE	0	Prothymosin alpha;Prothymosin alpha, N-terminally processed;Thymosin alpha-1
LYAR	Q9NX58	0.0117	0.974	0.989	FALSE	FALSE	FALSE	0	Cell growth-regulating nucleolar protein
U2AF2	P26368	0.00743	0.975	0.989	FALSE	FALSE	FALSE	0	Splicing factor U2AF 65 kDa subunit
PYGL	P06737	-0.00655	0.976	0.989	FALSE	FALSE	FALSE	0	Glycogen phosphorylase, liver form
CAD	P27708	0.0137	0.979	0.992	FALSE	FALSE	FALSE	0	CAD protein;Glutamine-dependent carbamoyl-phosphate synthase;Aspartate carbamoyltransferase;Dihydroorotase
PSME1	Q06323	-0.00927	0.981	0.992	FALSE	FALSE	FALSE	0	Proteasome activator complex subunit 1
TSTA3	Q13630	0.007	0.981	0.992	FALSE	FALSE	FALSE	0	GDP-L-fucose synthase
AKAP8	O43823	-0.00697	0.988	0.995	FALSE	FALSE	TRUE	4	A-kinase anchor protein 8
CDC37	Q16543	-0.00472	0.988	0.995	FALSE	FALSE	FALSE	0	Hsp90 co-chaperone Cdc37;Hsp90 co-chaperone Cdc37, N-terminally processed
HMGN1	P05114	0.00535	0.988	0.995	FALSE	FALSE	FALSE	0	Non-histone chromosomal protein HMG-14
CHMP5	Q9NZZ3	-0.00424	0.99	0.995	FALSE	FALSE	FALSE	0	Charged multivesicular body protein 5
ADH5	P11766	0.00339	0.992	0.996	FALSE	FALSE	FALSE	0	Alcohol dehydrogenase class-3
PPIH	O43447	0.00288	0.992	0.996	FALSE	FALSE	FALSE	0	Peptidyl-prolyl cis-trans isomerase H
ATXN2L	Q8WWM7	0.00121	0.995	0.998	FALSE	FALSE	FALSE	0	Ataxin-2-like protein
CNPY2	Q9Y2B0	0.00108	0.997	0.998	FALSE	FALSE	FALSE	0	Protein canopy homolog 2
WIPF1	O43516	-0.000306	0.999	0.999	FALSE	FALSE	FALSE	0	WAS/WASL-interacting protein family member 1

## Sheet: Table S6
Table S6: Secreted proteins enriched in HMC-1-SAMD14+ conditioned media compared to HMC-1 conditioned media based on a threshold of FC >2 and p value < 0.05.
Gene Name	Protein IDs	SAMD14_vs_C_log2 fold change	SAMD14_vs_C_p.val	SAMD14_vs_C_p.adj	significant	SAMD14_vs_C_significant	imputed	num_NAs	Protein.names
APLP2	Q06481	4.69	5.38e-06	0.00156	TRUE	TRUE	TRUE	3	Amyloid-like protein 2
CD44	P16070	4.3	4.09e-06	0.00156	TRUE	TRUE	TRUE	3	CD44 antigen
TMA7	Q9Y2S6	4.25	1.36e-05	0.00168	TRUE	TRUE	TRUE	3	Translation machinery-associated protein 7
NOLC1	Q14978	3.75	1.11e-05	0.0016	TRUE	TRUE	TRUE	3	Nucleolar and coiled-body phosphoprotein 1
SAMD14	Q8IZD0	3.72	4.68e-05	0.00239	TRUE	TRUE	TRUE	3	Sterile alpha motif domain-containing protein 14
PDCD4	Q53EL6	3.28	0.000576	0.0111	TRUE	TRUE	TRUE	3	Programmed cell death protein 4
GMFG	O60234	3.24	0.000392	0.00828	TRUE	TRUE	TRUE	3	Glia maturation factor gamma
EIF4G1	Q04637	3.17	0.000671	0.0121	TRUE	TRUE	TRUE	3	Eukaryotic translation initiation factor 4 gamma 1
NAGK	Q9UJ70	3.02	0.000232	0.00606	TRUE	TRUE	TRUE	3	N-acetyl-D-glucosamine kinase
BUB3	O43684	2.92	0.00161	0.0215	TRUE	TRUE	TRUE	3	Mitotic checkpoint protein BUB3
CS	O75390	2.77	0.0274	0.147	FALSE	FALSE	TRUE	2	Citrate synthase, mitochondrial
ARPC1B	O15143	2.74	0.000131	0.00405	TRUE	TRUE	TRUE	3	Actin-related protein 2/3 complex subunit 1B
RPL28	P46779	2.74	0.00436	0.0451	TRUE	TRUE	TRUE	3	60S ribosomal protein L28
CNPY3	Q9BT09	2.63	5.67e-05	0.00259	TRUE	TRUE	TRUE	3	Protein canopy homolog 3
MAGEA4	P43358	2.57	3.08e-05	0.0023	TRUE	TRUE	TRUE	3	Melanoma-associated antigen 4
ATP6AP1	Q15904	2.37	0.000921	0.0143	TRUE	TRUE	TRUE	3	V-type proton ATPase subunit S1
MFGE8	Q08431	2.34	0.00595	0.0549	FALSE	FALSE	TRUE	3	Lactadherin;Lactadherin short form;Medin
PSMB9	P28065	2.28	0.000261	0.00647	TRUE	TRUE	TRUE	3	Proteasome subunit beta type-9
RPL13	P26373	2.22	0.00903	0.0738	FALSE	FALSE	TRUE	4	60S ribosomal protein L13
ADRM1	Q16186	2.21	0.000114	0.00393	TRUE	TRUE	TRUE	3	Proteasomal ubiquitin receptor ADRM1
SF3B3	Q15393	2.18	0.000122	0.00393	TRUE	TRUE	TRUE	3	Splicing factor 3B subunit 3
CD55	P08174	2.08	0.000888	0.0143	TRUE	TRUE	TRUE	3	Complement decay-accelerating factor
HTATSF1	O43719	2.06	0.00189	0.0241	TRUE	TRUE	TRUE	3	HIV Tat-specific factor 1
HUWE1	Q7Z6Z7	2.05	0.00492	0.0474	TRUE	TRUE	TRUE	3	E3 ubiquitin-protein ligase HUWE1
UGP2	Q16851	2.03	0.00114	0.0171	TRUE	TRUE	TRUE	3	UTP--glucose-1-phosphate uridylyltransferase
CSNK2A1	P68400	2.03	0.00148	0.0202	TRUE	TRUE	TRUE	3	Casein kinase II subunit alpha;Casein kinase II subunit alpha 3
ZRANB2	O95218	2.02	0.0033	0.0358	TRUE	TRUE	TRUE	3	Zinc finger Ran-binding domain-containing protein 2
ZPR1	O75312	1.99	0.000288	0.00671	TRUE	TRUE	TRUE	4	Zinc finger protein ZPR1
ACAT1	P24752	1.99	0.00149	0.0202	TRUE	TRUE	TRUE	4	Acetyl-CoA acetyltransferase, mitochondrial
MAX	P61244	1.97	0.00314	0.0345	TRUE	TRUE	TRUE	3	Protein max
RRP1B	Q14684	1.93	0.000294	0.00671	TRUE	TRUE	TRUE	3	Ribosomal RNA processing protein 1 homolog B
SF3A3	Q12874	1.79	0.000238	0.00606	TRUE	TRUE	TRUE	4	Splicing factor 3A subunit 3
PSMC3	P17980	1.73	0.0161	0.106	FALSE	FALSE	TRUE	3	26S protease regulatory subunit 6A
TNFRSF14	Q92956	1.72	0.0392	0.183	FALSE	FALSE	TRUE	3	Tumor necrosis factor receptor superfamily member 14
ANP32B	Q92688	1.68	0.00187	0.0241	TRUE	TRUE	FALSE	0	Acidic leucine-rich nuclear phosphoprotein 32 family member B
CAND1	Q86VP6	1.64	0.000368	0.00797	TRUE	TRUE	TRUE	4	Cullin-associated NEDD8-dissociated protein 1
TXLNA	P40222	1.63	0.00123	0.0178	TRUE	TRUE	TRUE	3	Alpha-taxilin
GGH	Q92820	1.61	0.0372	0.178	FALSE	FALSE	TRUE	4	Gamma-glutamyl hydrolase
AKAP2	Q9Y2D5	1.6	0.00773	0.0657	FALSE	FALSE	TRUE	3	A-kinase anchor protein 2
MCM3	P25205	1.56	0.00442	0.0451	TRUE	TRUE	TRUE	3	DNA replication licensing factor MCM3
PRPF8	Q6P2Q9	1.55	0.0074	0.0648	FALSE	FALSE	TRUE	4	Pre-mRNA-processing-splicing factor 8
ABHD10	Q9NUJ1	1.49	0.0328	0.163	FALSE	FALSE	TRUE	3	Mycophenolic acid acyl-glucuronide esterase, mitochondrial
FUCA1	P04066	1.42	0.00119	0.0174	TRUE	TRUE	FALSE	0	Tissue alpha-L-fucosidase
TAF15	Q92804	1.42	0.0376	0.178	FALSE	FALSE	TRUE	3	TATA-binding protein-associated factor 2N
LAMC1	P11047	1.39	0.0182	0.115	FALSE	FALSE	TRUE	3	Laminin subunit gamma-1
PRG2	P13727	1.38	0.000657	0.0121	TRUE	TRUE	FALSE	0	Bone marrow proteoglycan;Eosinophil granule major basic protein
TPSAB1	Q15661	1.38	0.00212	0.0255	TRUE	TRUE	FALSE	0	Tryptase alpha/beta-1;Tryptase beta-2
DPP7	Q9UHL4	1.34	0.03	0.153	FALSE	FALSE	FALSE	0	Dipeptidyl peptidase 2
TUBA1A	Q71U36	1.33	0.017	0.108	FALSE	FALSE	FALSE	0	Tubulin alpha-1A chain;Tubulin alpha-1B chain;Tubulin alpha-3E chain
KIFC1	Q9BW19	1.26	0.0119	0.0859	FALSE	FALSE	TRUE	3	Kinesin-like protein KIFC1
RBM14	Q96PK6	1.25	0.0364	0.177	FALSE	FALSE	TRUE	4	RNA-binding protein 14
GALNT2	Q10471	1.24	0.00684	0.0614	FALSE	FALSE	TRUE	3	Polypeptide N-acetylgalactosaminyltransferase 2;Polypeptide N-acetylgalactosaminyltransferase 2 soluble form
CCDC9	Q9Y3X0	1.24	0.0207	0.123	FALSE	FALSE	TRUE	3	Coiled-coil domain-containing protein 9
CLEC11A	Q9Y240	1.17	0.0139	0.0932	FALSE	FALSE	FALSE	0	C-type lectin domain family 11 member A
ARPC2	O15144	1.15	0.0101	0.0787	FALSE	FALSE	FALSE	0	Actin-related protein 2/3 complex subunit 2
RPS16	P62249	1.15	0.0206	0.123	FALSE	FALSE	FALSE	0	40S ribosomal protein S16
CDCA3	Q99618	1.13	0.00926	0.075	FALSE	FALSE	TRUE	4	Cell division cycle-associated protein 3
VIM	P08670	1.12	0.0456	0.2	FALSE	FALSE	FALSE	0	Vimentin
NRCAM	Q92823	1.11	0.00439	0.0451	TRUE	TRUE	FALSE	0	Neuronal cell adhesion molecule
HSP90AA1	P07900	1.11	0.0408	0.187	FALSE	FALSE	FALSE	0	Heat shock protein HSP 90-alpha
HSP90B1	P14625	1.09	0.0182	0.115	FALSE	FALSE	FALSE	0	Endoplasmin
RNASET2	O00584	1.07	0.00282	0.0318	TRUE	TRUE	FALSE	0	Ribonuclease T2
ITGB1	P05556	1.05	0.0288	0.149	FALSE	FALSE	FALSE	0	Integrin beta-1
SRSF1	Q07955	1.01	0.00875	0.073	FALSE	FALSE	FALSE	0	Serine/arginine-rich splicing factor 1
ENO3	P13929	-1.06	0.00521	0.0491	TRUE	TRUE	FALSE	0	Beta-enolase
PLAUR	Q03405	-1.06	0.0362	0.177	FALSE	FALSE	TRUE	3	Urokinase plasminogen activator surface receptor
BAG3	O95817	-1.09	0.0261	0.143	FALSE	FALSE	TRUE	3	BAG family molecular chaperone regulator 3
GAA	P10253	-1.1	0.0386	0.182	FALSE	FALSE	TRUE	3	Lysosomal alpha-glucosidase;76 kDa lysosomal alpha-glucosidase;70 kDa lysosomal alpha-glucosidase
SCRN2	Q96FV2	-1.11	0.00686	0.0614	FALSE	FALSE	TRUE	3	Secernin-2
ARHGAP25	P42331	-1.14	0.0469	0.201	FALSE	FALSE	TRUE	1	Rho GTPase-activating protein 25
LGALS3BP	Q08380	-1.16	0.000754	0.0131	TRUE	TRUE	FALSE	0	Galectin-3-binding protein
WDR44	Q5JSH3	-1.16	0.0321	0.161	FALSE	FALSE	TRUE	4	WD repeat-containing protein 44
MT2A	P02795	-1.19	0.047	0.201	FALSE	FALSE	FALSE	0	Metallothionein-2
MAGOHB	Q96A72	-1.26	0.00712	0.063	FALSE	FALSE	TRUE	3	Protein mago nashi homolog 2;Protein mago nashi homolog
ACP1	P24666	-1.3	0.0246	0.137	FALSE	FALSE	TRUE	3	Low molecular weight phosphotyrosine protein phosphatase
ZC3H18	Q86VM9	-1.35	0.0104	0.0795	FALSE	FALSE	TRUE	3	Zinc finger CCCH domain-containing protein 18
LNPEP	Q9UIQ6	-1.36	0.00766	0.0657	FALSE	FALSE	TRUE	2	Leucyl-cystinyl aminopeptidase;Leucyl-cystinyl aminopeptidase, pregnancy serum form
ARSB	P15848	-1.39	0.0166	0.107	FALSE	FALSE	TRUE	3	Arylsulfatase B
AMDHD2	Q9Y303	-1.42	0.01	0.0787	FALSE	FALSE	TRUE	3	Putative N-acetylglucosamine-6-phosphate deacetylase
FARSA	Q9Y285	-1.46	0.0106	0.0805	FALSE	FALSE	TRUE	4	Phenylalanine--tRNA ligase alpha subunit
TCEAL4	Q96EI5	-1.55	0.00553	0.0516	FALSE	FALSE	TRUE	3	Transcription elongation factor A protein-like 4
PRRC2A	P48634	-1.57	0.00224	0.0266	TRUE	TRUE	TRUE	3	Protein PRRC2A
MAP1A	P78559	-1.59	0.000284	0.00671	TRUE	TRUE	TRUE	3	Microtubule-associated protein 1A;MAP1A heavy chain;MAP1 light chain LC2
HYOU1	Q9Y4L1	-1.59	0.00303	0.0336	TRUE	TRUE	TRUE	3	Hypoxia up-regulated protein 1
ICAM3	P32942	-1.59	0.019	0.118	FALSE	FALSE	TRUE	1	Intercellular adhesion molecule 3
MYL12A	P19105	-1.62	0.0302	0.153	FALSE	FALSE	TRUE	3	Myosin regulatory light chain 12A;Myosin regulatory light chain 12B;Myosin regulatory light polypeptide 9
GALC	P54803	-1.65	0.0138	0.0932	FALSE	FALSE	TRUE	4	Galactocerebrosidase
TMX3	Q96JJ7	-1.66	0.0109	0.081	FALSE	FALSE	TRUE	3	Protein disulfide-isomerase TMX3
TBC1D10B	Q4KMP7	-1.7	0.028	0.148	FALSE	FALSE	TRUE	4	TBC1 domain family member 10B
C2orf49	Q9BVC5	-1.74	0.00275	0.0314	TRUE	TRUE	TRUE	3	Ashwin
FBP1	P09467	-1.75	0.00261	0.0302	TRUE	TRUE	FALSE	0	Fructose-1,6-bisphosphatase 1
WDR12	Q9GZL7	-1.79	0.0374	0.178	FALSE	FALSE	TRUE	4	Ribosome biogenesis protein WDR12
PPP1R14B	Q96C90	-1.8	0.0107	0.0805	FALSE	FALSE	TRUE	3	Protein phosphatase 1 regulatory subunit 14B
PAPOLA	P51003	-1.81	0.0203	0.123	FALSE	FALSE	TRUE	4	Poly(A) polymerase alpha
IARS2	Q9NSE4	-1.82	0.00886	0.0731	FALSE	FALSE	TRUE	3	Isoleucine--tRNA ligase, mitochondrial
ALDH4A1	P30038	-1.88	0.00197	0.0244	TRUE	TRUE	TRUE	3	Delta-1-pyrroline-5-carboxylate dehydrogenase, mitochondrial
FAM120A	Q9NZB2	-1.91	0.00127	0.018	TRUE	TRUE	TRUE	3	Constitutive coactivator of PPAR-gamma-like protein 1
MRC2	Q9UBG0	-1.92	0.0232	0.132	FALSE	FALSE	TRUE	4	C-type mannose receptor 2
APRT	P07741	-1.93	0.0147	0.0975	FALSE	FALSE	TRUE	4	Adenine phosphoribosyltransferase
NAPRT	Q6XQN6	-1.95	0.000797	0.0134	TRUE	TRUE	TRUE	3	Nicotinate phosphoribosyltransferase
DNASE2	O00115	-1.95	0.0226	0.132	FALSE	FALSE	TRUE	4	Deoxyribonuclease-2-alpha
TCEB2	Q15370	-1.97	6.24e-05	0.0027	TRUE	TRUE	TRUE	3	Transcription elongation factor B polypeptide 2
GLUD2	P49448	-2.01	0.000922	0.0143	TRUE	TRUE	TRUE	3	Glutamate dehydrogenase 2, mitochondrial
RPL9	P32969	-2.01	0.0137	0.0932	FALSE	FALSE	TRUE	2	60S ribosomal protein L9
PPP5C	P53041	-2.02	4.98e-05	0.0024	TRUE	TRUE	TRUE	3	Serine/threonine-protein phosphatase 5
LHPP	Q9H008	-2.02	0.00935	0.0751	FALSE	FALSE	TRUE	1	Phospholysine phosphohistidine inorganic pyrophosphate phosphatase
AAMP	Q13685	-2.05	0.0169	0.108	FALSE	FALSE	TRUE	3	Angio-associated migratory cell protein
ABI1	Q8IZP0	-2.05	0.0443	0.196	FALSE	FALSE	TRUE	4	Abl interactor 1
C14orf142	Q9BXV9	-2.07	0.000551	0.0108	TRUE	TRUE	TRUE	3	Uncharacterized protein C14orf142
CHORDC1	Q9UHD1	-2.08	0.00172	0.0225	TRUE	TRUE	TRUE	3	Cysteine and histidine-rich domain-containing protein 1
SMARCA5	O60264	-2.13	0.000818	0.0134	TRUE	TRUE	TRUE	3	SWI/SNF-related matrix-associated actin-dependent regulator of chromatin subfamily A member 5
RRP9	O43818	-2.13	0.0141	0.0944	FALSE	FALSE	TRUE	2	U3 small nucleolar RNA-interacting protein 2
EIF1AX	P47813	-2.15	0.000457	0.00922	TRUE	TRUE	TRUE	3	Eukaryotic translation initiation factor 1A, X-chromosomal;Eukaryotic translation initiation factor 1A, Y-chromosomal
PRDX4	Q13162	-2.16	0.000752	0.0131	TRUE	TRUE	TRUE	3	Peroxiredoxin-4
AIFM1	O95831	-2.2	0.00243	0.0285	TRUE	TRUE	TRUE	3	Apoptosis-inducing factor 1, mitochondrial
PHPT1	Q9NRX4	-2.27	0.0248	0.137	FALSE	FALSE	FALSE	0	14 kDa phosphohistidine phosphatase
CPOX	P36551	-2.28	0.00195	0.0244	TRUE	TRUE	TRUE	3	Oxygen-dependent coproporphyrinogen-III oxidase, mitochondrial
SLTM	Q9NWH9	-2.3	0.00944	0.0751	FALSE	FALSE	TRUE	4	SAFB-like transcription modulator
HMGCS1	Q01581	-2.34	0.000432	0.00892	TRUE	TRUE	TRUE	3	Hydroxymethylglutaryl-CoA synthase, cytoplasmic
SRRT	Q9BXP5	-2.36	0.000105	0.00393	TRUE	TRUE	TRUE	3	Serrate RNA effector molecule homolog
CHD4	Q14839	-2.37	2.43e-05	0.00211	TRUE	TRUE	TRUE	3	Chromodomain-helicase-DNA-binding protein 4
IMMT	Q16891	-2.37	0.00771	0.0657	FALSE	FALSE	TRUE	3	MICOS complex subunit MIC60
PUF60	Q9UHX1	-2.38	4.27e-05	0.00239	TRUE	TRUE	TRUE	3	Poly(U)-binding-splicing factor PUF60
RPL27A	P46776	-2.38	0.00476	0.0474	TRUE	TRUE	TRUE	3	60S ribosomal protein L27a
SF1	Q15637	-2.46	0.000181	0.00525	TRUE	TRUE	TRUE	3	Splicing factor 1
CPSF6	Q16630	-2.49	0.000118	0.00393	TRUE	TRUE	TRUE	3	Cleavage and polyadenylation specificity factor subunit 6
HCFC1	P51610	-2.54	3.33e-05	0.0023	TRUE	TRUE	TRUE	3	Host cell factor 1;HCF N-terminal chain 1;HCF N-terminal chain 2;HCF N-terminal chain 3;HCF N-terminal chain 4;HCF N-terminal chain 5;HCF N-terminal chain 6;HCF C-terminal chain 1;HCF C-terminal chain 2;HCF C-terminal chain 3;HCF C-terminal chain 4;HCF C-terminal chain 5;HCF C-terminal chain 6
CCDC86	Q9H6F5	-2.58	0.000821	0.0134	TRUE	TRUE	TRUE	3	Coiled-coil domain-containing protein 86
TOP2B	Q02880	-2.6	8.43e-05	0.00332	TRUE	TRUE	TRUE	3	DNA topoisomerase 2-beta
ITM2B	Q9Y287	-2.61	4.67e-05	0.00239	TRUE	TRUE	TRUE	3	Integral membrane protein 2B;BRI2, membrane form;BRI2 intracellular domain;BRI2C, soluble form;Bri23 peptide
SLK	Q9H2G2	-2.66	0.002	0.0244	TRUE	TRUE	TRUE	3	STE20-like serine/threonine-protein kinase
VPS26A	O75436	-2.66	0.0414	0.187	FALSE	FALSE	TRUE	4	Vacuolar protein sorting-associated protein 26A
PLRG1	O43660	-2.67	0.00102	0.0155	TRUE	TRUE	TRUE	3	Pleiotropic regulator 1
XYLT1	Q86Y38	-2.74	0.0013	0.0182	TRUE	TRUE	TRUE	3	Xylosyltransferase 1
SNRNP40	Q96DI7	-2.83	4.19e-06	0.00156	TRUE	TRUE	TRUE	3	U5 small nuclear ribonucleoprotein 40 kDa protein
HLA-A	P30459	-2.84	1e-05	0.0016	TRUE	TRUE	TRUE	3	HLA class I histocompatibility antigen, A-74 alpha chain;HLA class I histocompatibility antigen, A-32 alpha chain;HLA class I histocompatibility antigen, A-36 alpha chain;HLA class I histocompatibility antigen, A-1 alpha chain;HLA class I histocompatibility antigen, A-11 alpha chain;HLA class I histocompatibility antigen, A-3 alpha chain
UBAP2L	Q14157	-2.86	0.000587	0.0111	TRUE	TRUE	TRUE	3	Ubiquitin-associated protein 2-like
C7orf50	Q9BRJ6	-2.88	8.2e-05	0.00332	TRUE	TRUE	TRUE	3	Uncharacterized protein C7orf50
HNRNPUL1	Q9BUJ2	-3.25	0.021	0.125	FALSE	FALSE	TRUE	2	Heterogeneous nuclear ribonucleoprotein U-like protein 1
PCMT1	P22061	-3.26	0.000119	0.00393	TRUE	TRUE	TRUE	3	Protein-L-isoaspartate(D-aspartate) O-methyltransferase
PRDX5	P30044	-3.31	0.000329	0.0073	TRUE	TRUE	TRUE	3	Peroxiredoxin-5, mitochondrial
VGF	O15240	-3.32	1.99e-05	0.00211	TRUE	TRUE	TRUE	3	Neurosecretory protein VGF;Neuroendocrine regulatory peptide-1;Neuroendocrine regulatory peptide-2;Antimicrobial peptide VGF[554-577]
C1orf123	Q9NWV4	-3.44	3.48e-05	0.0023	TRUE	TRUE	TRUE	3	UPF0587 protein C1orf123
LASP1	Q14847	-3.45	1.05e-05	0.0016	TRUE	TRUE	TRUE	3	LIM and SH3 domain protein 1
HIRIP3	Q9BW71	-3.47	0.000215	0.00602	TRUE	TRUE	TRUE	3	HIRA-interacting protein 3
AIMP1	Q12904	-3.52	0.000223	0.00605	TRUE	TRUE	TRUE	3	Aminoacyl tRNA synthase complex-interacting multifunctional protein 1;Endothelial monocyte-activating polypeptide 2
EEF1D	P29692	-4.07	2.27e-05	0.00211	TRUE	TRUE	TRUE	3	Elongation factor 1-delta
PDCD5	O14737	-4.7	0.000182	0.00525	TRUE	TRUE	TRUE	3	Programmed cell death protein 5
RPL26L1	Q9UNX3	-5.92	3.71e-05	0.0023	TRUE	TRUE	TRUE	3	60S ribosomal protein L26-like 1;60S ribosomal protein L26

## Sheet: Table S7
Table S7: Gene Ontology enrichment analysis of the differentially secreted proteins enriched in HMC-1-SAMD14+ CM compared to HMC-1 CM (p<0.05; FC>2).
GO-term	description	count in gene set	false discovery rate	-log10 FDR	Fold enrichment
GO:0045055	regulated exocytosis	13 of 691	0.0001	4	5.7544
GO:0043312	neutrophil degranulation	12 of 485	0.0001	4	7.58578
GO:0006887	exocytosis	14 of 774	0.0001	4	5.49541
GO:0002376	immune system process	23 of 2370	0.0001	4	2.95121
GO:0045321	leukocyte activation	14 of 894	0.00011	3.95861	4.7863
GO:0016192	vesicle-mediated transport	19 of 1699	0.00013	3.88606	3.38844
GO:0016071	mRNA metabolic process	12 of 667	0.00015	3.82391	5.49541
GO:0002252	immune effector process	14 of 927	0.00015	3.82391	4.57088
GO:0009057	macromolecule catabolic process	14 of 970	0.00021	3.67778	4.36516
GO:1901575	organic substance catabolic process	17 of 1609	0.00084	3.07572	3.23594
GO:0044248	cellular catabolic process	17 of 1646	0.0011	2.95861	3.16228
GO:0043170	macromolecule metabolic process	41 of 7453	0.0015	2.82391	1.69824
GO:0006955	immune response	16 of 1560	0.0021	2.67778	3.16228
GO:0008380	RNA splicing	8 of 391	0.0027	2.56864	6.30957
GO:0044265	cellular macromolecule catabolic process	11 of 842	0.005	2.30103	3.98107
GO:0071704	organic substance metabolic process	45 of 9135	0.0063	2.20066	1.51356
GO:0044085	cellular component biogenesis	20 of 2556	0.0067	2.17393	2.39883
GO:0006397	mRNA processing	8 of 456	0.0067	2.17393	5.37032
GO:0006401	RNA catabolic process	6 of 237	0.0069	2.16115	7.76247
GO:0031334	positive regulation of protein complex assembly	6 of 241	0.0073	2.13668	7.58578
GO:0006807	nitrogen compound metabolic process	42 of 8349	0.0086	2.0655	1.54882
GO:0044772	mitotic cell cycle phase transition	6 of 254	0.0092	2.03621	7.24436
GO:0043687	post-translational protein modification	7 of 365	0.0092	2.03621	5.88844
GO:0000278	mitotic cell cycle	9 of 628	0.0092	2.03621	4.36516
GO:0071840	cellular component organization or biogenesis	31 of 5342	0.0107	1.97062	1.77828
GO:0044403	symbiont process	9 of 650	0.0109	1.96257	4.2658
GO:0044238	primary metabolic process	43 of 8808	0.0115	1.9393	1.47911
GO:1901136	carbohydrate derivative catabolic process	5 of 175	0.0116	1.93554	8.70964
GO:0034655	nucleobase-containing compound catabolic process	7 of 394	0.0119	1.92445	5.37032
GO:0002253	activation of immune response	7 of 393	0.0119	1.92445	5.49541
GO:0006396	RNA processing	10 of 825	0.0124	1.90658	3.71535
GO:0016139	glycoside catabolic process	2 of 7	0.013	1.88606	87.0964
GO:0022613	ribonucleoprotein complex biogenesis	7 of 409	0.0135	1.86967	5.24807
GO:0009987	cellular process	59 of 14652	0.0135	1.86967	1.23027
GO:1903047	mitotic cell cycle process	8 of 564	0.0163	1.78781	4.36516
GO:0051234	establishment of localization	26 of 4248	0.0163	1.78781	1.86209
GO:0043254	regulation of protein complex assembly	7 of 425	0.0163	1.78781	5.01187
GO:0016032	viral process	8 of 571	0.0173	1.76195	4.2658
GO:0000184	nuclear-transcribed mRNA catabolic process, nonsense-mediated decay	4 of 118	0.0193	1.71444	10.4713
GO:0044237	cellular metabolic process	42 of 8797	0.0199	1.70115	1.44544
GO:0045899	positive regulation of RNA polymerase II transcriptional preinitiation complex assembly	2 of 11	0.0214	1.66959	54.9541
GO:0000082	G1/S transition of mitotic cell cycle	4 of 123	0.0214	1.66959	10
GO:0006810	transport	25 of 4130	0.0216	1.66555	1.86209
GO:0016043	cellular component organization	29 of 5163	0.0222	1.65365	1.69824
GO:0048518	positive regulation of biological process	30 of 5459	0.0243	1.61439	1.69824
GO:0022617	extracellular matrix disassembly	3 of 58	0.0258	1.58838	15.8489
GO:0007010	cytoskeleton organization	10 of 953	0.0258	1.58838	3.23594
GO:0051179	localization	29 of 5233	0.026	1.58503	1.69824
GO:0022607	cellular component assembly	17 of 2343	0.0269	1.57025	2.23872
GO:0030029	actin filament-based process	7 of 493	0.0273	1.56384	4.36516
GO:0006413	translational initiation	4 of 142	0.0297	1.52724	8.70964
GO:0019221	cytokine-mediated signaling pathway	8 of 655	0.0301	1.52143	3.71535
GO:0097435	supramolecular fiber organization	6 of 383	0.0363	1.44009	4.7863
GO:0051246	regulation of protein metabolic process	18 of 2668	0.0389	1.41005	2.04174
GO:0052548	regulation of endopeptidase activity	6 of 393	0.0397	1.40121	4.67735
GO:0038096	Fc-gamma receptor signaling pathway involved in phagocytosis	3 of 73	0.0408	1.38934	12.5893
GO:0048522	positive regulation of cellular process	27 of 4898	0.0409	1.38828	1.69824
GO:0007167	enzyme linked receptor protein signaling pathway	8 of 698	0.0409	1.38828	3.46737
GO:0034314	Arp2/3 complex-mediated actin nucleation	2 of 19	0.0419	1.37779	32.3594
GO:0019058	viral life cycle	4 of 166	0.044	1.35655	7.4131
GO:0002684	positive regulation of immune system process	9 of 882	0.044	1.35655	3.0903
GO:0051704	multi-organism process	17 of 2514	0.0463	1.33442	2.0893
GO:0046483	heterocycle metabolic process	26 of 4716	0.0464	1.33348	1.69824
GO:0019538	protein metabolic process	24 of 4194	0.0464	1.33348	1.7378
GO:0009226	nucleotide-sugar biosynthetic process	2 of 21	0.0464	1.33348	28.8403
GO:0007049	cell cycle	11 of 1263	0.0464	1.33348	2.69153
GO:0000398	mRNA splicing, via spliceosome	5 of 284	0.0464	1.33348	5.37032
GO:0030162	regulation of proteolysis	8 of 742	0.0491	1.30892	3.31131
GO:0006725	cellular aromatic compound metabolic process	26 of 4754	0.0491	1.30892	1.65959

## Sheet: Table S8
Table S8: Gene Ontology enrichment analysis of the differentially secreted proteins reduced in HMC-1-SAMD14+ CM compared to HMC-1 CM (p<0.05; FC<-1.5).
GO-term	description	count in gene set	false discovery rate	-log10 FDR
GO:0034641	cellular nitrogen compound metabolic process	44 of 5126	0.009	2.04576
GO:0006807	nitrogen compound metabolic process	61 of 8349	0.009	2.04576
GO:0006518	peptide metabolic process	11 of 497	0.009	2.04576
GO:0044238	primary metabolic process	63 of 8808	0.0094	2.02687
GO:0044237	cellular metabolic process	63 of 8797	0.0094	2.02687
GO:0071704	organic substance metabolic process	64 of 9135	0.0138	1.86012
GO:0008152	metabolic process	66 of 9569	0.0139	1.85699
GO:0005985	sucrose metabolic process	2 of 3	0.0246	1.60906
GO:0043603	cellular amide metabolic process	12 of 732	0.0275	1.56067
GO:0046483	heterocycle metabolic process	39 of 4716	0.0286	1.54363
GO:1901360	organic cyclic compound metabolic process	40 of 4963	0.038	1.42022
GO:0000375	RNA splicing, via transesterification reactions	10 of 287	0.0039	2.40894
GO:0016071	mRNA metabolic process	14 of 667	0.0057	2.24413
GO:0006397	mRNA processing	11 of 456	0.009	2.04576
GO:0000398	mRNA splicing, via spliceosome	9 of 284	0.009	2.04576
GO:0006396	RNA processing	13 of 825	0.0246	1.60906
GO:0006412	translation	10 of 362	0.009	2.04576
GO:1901566	organonitrogen compound biosynthetic process	18 of 1370	0.0157	1.8041
GO:0044271	cellular nitrogen compound biosynthetic process	32 of 3528	0.0275	1.56067

## Sheet: Table S9
Table S9: Antibody details and staining conditions for immunohistochemistry.
Primary antibody	Supplier	Species and isotype	Concentration or dilution	Epitope retrieval	First antibody and DAB/Fast red incubation
Leica BOND-MAX TM automated system
AMACR	DAKO	Rabbit IgG	0.55 μg/ml	Epitope retrieval 2, 30 min	60 min, Fast red 15 min
p63	Leica	Rabbit IgG	0.25 μg/ml	Epitope retrieval 2, 30 min	60 min, DAB 5 min
SAMD14	Novus Biologicals	Rabbit IgG	0.5 μg/ml	Epitope retrieval 2, 30 min	60 min, DAB 5 min
Tryptase	Leica	Mouse IgG2b	1 : 300	Epitope retrieval 2, 30 min	60 min, Fast red 15 min
Rabbit IgG control	Dako	Rabbit IgG	0.5 μg/ml	Epitope retrieval 2, 30 min	60 min, DAB 5 min
Mouse IgG2b control	BioLegend	Mouse IgG2b	1 : 200	Epitope retrieval 2, 30 min	60 min, Fast red 15 min

## Sheet: Table S10
Table S10: Clinicopathological features of tumors of origin for cultured fibroblast cell-lines (Cancer associated fibroblasts-CAFs and Non-malignant prostate fibroblasts - NPFs). Primary patient-matched prostatic fibroblasts were derived from a cohort of men with localised prostate cancer. Cohort was varied in terms of age, focality and invasion and represents moderate to high localized prostate …
Patient ID	Patient Age	Gleason score (Index tumour)	Grade Group	PSA ng/mL	Tumour volume	TNM Stage	Focality	Perineural invasion	Extraprostatic extension (EPE)	Seminal vesicle (SV) involvement	Margins	Clinical Followup
P107	68.7	7(4+3)	3	n/a	n/a	pT3b	multifocal	Present	present	present - Left SV	Clear	Unknown
P128	56.7	7(4+3)	3	6	1.8	pT3b	unifocal	Present	present	present - Left SV	positive	Recurrent Disease
P332	68	9(5+4)	5	11	5.4	pT3a	multifocal	Present	present	Not identified	positive	Recurrent Disease
